# Supplementary material for: Social media use and mental health during the COVID-19 pandemic in young adults: a meta-analysis of 14 cross-sectional studies
Source: Springer Nature journal article supplement (doi:10.1186/s12889-022-13409-0), 2022-05-17
Supplement: MOESM2 [file 20422136]

| <b>Supplementary material 8. List of retrieved papers sorted by given type of estimates and research outcomes</b> |                                      |                                      |                                   |
|-------------------------------------------------------------------------------------------------------------------|--------------------------------------|--------------------------------------|-----------------------------------|
| <b>Study outcome</b>                                                                                              | <b>Given estimates in each study</b> |                                      |                                   |
|                                                                                                                   | <b>Odds ratio (N=12)</b>             | <b>regression coefficients (N=6)</b> | <b>Pearson's r (N=4)</b>          |
| <b>Anxiety (N=13)</b>                                                                                             | 1. Gao J et al. 2020                 | 7. Liu JCJ et al. 2020               | 10. Chao M et al. 2020            |
|                                                                                                                   | 2. Lu P et al. 2020                  | 8. Chao M et al. 2020                | 11. Kazan Kızılkurt O et al. 2020 |
|                                                                                                                   | 3. Widiyanto A et al. 2020           | 9. Ruggieri S et al. 2020            | 12. Drouin M et al. 2020          |
|                                                                                                                   | 4. Hossain T et al. 20               |                                      | 13. Drouin M et al. 2020          |
|                                                                                                                   | 5. Ni MY et al. 2020                 |                                      |                                   |
|                                                                                                                   | 6. Su J et al. 2020                  |                                      |                                   |
| <b>Depression (N=9)</b>                                                                                           | 1. Gao J et al. 2020                 | 7. Liu JCJ et al. 2020               |                                   |
|                                                                                                                   | 2. Lu P et al. 2020                  | 8. Chao M et al. 2020                |                                   |
|                                                                                                                   | 3. Mohammadi MR et al. 2020          | 9. Ruggieri S et al. 2020            |                                   |
|                                                                                                                   | 4. Widiyanto A et al. 2020           |                                      |                                   |
|                                                                                                                   | 5. Lee Y et al. 2020                 |                                      |                                   |
|                                                                                                                   | 6. Ni MY et al. 2020                 |                                      |                                   |
| Duplicate studies are shaded.                                                                                     |                                      |                                      |                                   |
