# Supplementary material for: Social media use and mental health during the COVID-19 pandemic in young adults: a meta-analysis of 14 cross-sectional studies
Source: BMC Public Health. 2022 May 17;22:995. doi: 10.1186/s12889-022-13409-0 (PMC9112239; doi:10.1186/s12889-022-13409-0)
Supplement: Supplementary file 1 — Additional file 1. [file 12889_2022_13409_MOESM1_ESM.pdf]

| study_n | author             | year | st_design | surv_type                                                                                                          | country                                                                   | total                                                                                                       | case      | age                                                                                     | sex                                                                | exposure                                                 | exposure criteria                                                                                                                                  | outcome                                                                                                                                                                                   | outcome             | adjustment                                                                                                                                             | or                                                                                                                                         | ci.lb | ci.ub |      |
|---------|--------------------|------|-----------|--------------------------------------------------------------------------------------------------------------------|---------------------------------------------------------------------------|-------------------------------------------------------------------------------------------------------------|-----------|-----------------------------------------------------------------------------------------|--------------------------------------------------------------------|----------------------------------------------------------|----------------------------------------------------------------------------------------------------------------------------------------------------|-------------------------------------------------------------------------------------------------------------------------------------------------------------------------------------------|---------------------|--------------------------------------------------------------------------------------------------------------------------------------------------------|--------------------------------------------------------------------------------------------------------------------------------------------|-------|-------|------|
| 1       | Gao J et al.       | 2020 | 4         | Online survey among Chinese citizens aged≥18 years                                                                 | Chinese citizens aged≥18 years (from 31 provinces and autonomous regions) | 4872                                                                                                        |           | Mean age, Mean (SD), 32.3 (10.0) Range: 18-85                                           | Male: 1,560 (32.3)<br>Female: 3,267 (67.7)                         | Social media exposure (SME)                              | During the past week, how often do you were exposed to news and information about COVID-19 on social media/ Less vs. (1) Sometimes, (2) Frequently | Anxiety                                                                                                                                                                                   | GAD-7 (cut-off: 10) | gender, age, marital status, educational level, income                                                                                                 | 1.72                                                                                                                                       | 1.31  | 2.26  |      |
| 2       | Lu P et al.        | 2020 | 4         | cross-sectional online study among citizens in Wuhan (via WeChat, QQ, and other social media networks)             | China (remotely among HWs and general public in Wuhan)                    | 1417                                                                                                        | 83 (21.7) | Age group, N(%) 18-25: 138 (9.7), 26-35: 441 (31.1), 31-40: 552 (39.0), >40: 286 (20.2) | Male: 235 (16.6)<br>Female: 1,182 (83.4)                           | Social media exposure (SME)                              | Few (reference), (1) sometime, (2) often in both healthcare workers and general public                                                             | Anxiety                                                                                                                                                                                   | GAD-7 (cut-off: 10) | gender, age, marital status, educational level, income                                                                                                 | 1.91                                                                                                                                       | 1.26  | 2.9   |      |
| 3       | Widiyanto A et al. | 2020 | 4         | online survey                                                                                                      | China                                                                     | 430                                                                                                         |           | Depression: No, 199 (46.28%); Yes, 231 (53.72%)<br>Anxiety: No, 230 (53.49%)            | < 20 190 (44.19)<br>≥ 20 240 (55.81)                               | Male 108 (25.12)<br>Female 322 (74.88)                   | Social media exposure                                                                                                                              | How often respondents during 3 months were exposed to news and information about COVID-19 on social media, such as Wechat, Television, Web, Whatsapp, Instagram and etc. (Low, ref, High) | Anxiety             | GAD7                                                                                                                                                   | gender, age, income, red area zone category (the existence of patients confirmed covid), implementation of Large-scale Social Restriction. | 1.64  | 1.18  | 3.04 |
| 4       | Hossain T et al.   | 2020 | 4         | questionnaire, based on the widely used google form, was forwarded to the participants with valid Facebook account | Bangladesh                                                                | 880                                                                                                         |           | Age group, N(%) ≤20: 150 (17.0), 21-25: 370 (42.0), 26-30: 176 (20.0), >30: 184 (20.9)  | Male: 616 (70.0)<br>Female: 264 (30.0)                             | Social media exposure (SME)                              | (2) Time spent on SME : ≤ 2 (ref), 4> hours                                                                                                        | Anxiety                                                                                                                                                                                   | GAD-7 (cut-off: 10) | Age, education, marital status, occupation, place of residence, electronic media exposure (EME), types of EME, time spent on EME, self reported health | 1.52                                                                                                                                       | 1.01  | 2.31  |      |
| 5       | Ni MY et al.       | 2020 | 4         | online survey via WeChat                                                                                           | China                                                                     | Total: 1791<br>community-based adults: probable anxiety n=376/probable depression n=303<br>HOW: 1577<br>214 |           | 18-34 community-based adults: 38.6%, HOW: 58.9%<br>35-44 28.4% 33.6%<br>>45 33.0% 7.5%  | Men community-based adults: 39.2%, HOW: 31.2%<br>Women 60.8% 68.8% | Time spent on COVID-19 news on social media per day      | (ref) Less than 1 hour<br>(2) 2 hrs or more                                                                                                        | Anxiety                                                                                                                                                                                   | GAD-2               | gender, marital status, educational level, employment, income                                                                                          | 2.78                                                                                                                                       | 2.01  | 3.84  |      |
| 6       | Su J et al.        | 2020 | 4         | online survey via WeChat                                                                                           | China                                                                     | 403                                                                                                         | 152       | mean(SD) 42 (11.2)                                                                      |                                                                    | Time spent on collecting information on social media use | *Time spent on collecting information (ref) <1 hrs<br>(2) 1-2 hrs                                                                                  | anxiety                                                                                                                                                                                   | GAD-7               | age, gender, marital status, education level and family income                                                                                         | 1.28                                                                                                                                       | 0.81  | 2.01  |      |

| study_n | author            | year | n_design | surv_type                                                                                                                     | country                    | survey period                                   | total | age                                                                                         | sex                                                                                 | exposure                                                        | exposure criteria          | outcome | outcome criteria                                                   | adjustment                                                                                                                                                                                                                                                                                                                                                                                                          | b     | se   | std | others |
|---------|-------------------|------|----------|-------------------------------------------------------------------------------------------------------------------------------|----------------------------|-------------------------------------------------|-------|---------------------------------------------------------------------------------------------|-------------------------------------------------------------------------------------|-----------------------------------------------------------------|----------------------------|---------|--------------------------------------------------------------------|---------------------------------------------------------------------------------------------------------------------------------------------------------------------------------------------------------------------------------------------------------------------------------------------------------------------------------------------------------------------------------------------------------------------|-------|------|-----|--------|
| 1       | Liu J et al.      | 2020 | 4        | Online survey (Participants responded to advertisements placed in Facebook/WhatsApp/community groups) aged at least 21 years. | Singapore adult population | March 7–April 21, 2020                          | 1,145 | Age group N(%),<br>21–34:467 (40.8)<br>35–49:394 (34.4)<br>50–64:220 (19.2)<br>≥65:64 (5.6) | Male: 32 (38.4)<br>Female: 75 (62.4) Did not answer: 48 (42)                        | the amount of time spent receiving and discussing COVID-19 news | (unit: hours/day)          | Anxiety | Subscale scores of Depression, Anxiety, and Stress Scale (DASS-21) | time spent getting COVID-19 updates, number of COVID-19 rumors heard, number of COVID-19 rumors shared, number of COVID-19 rumors believed, use of government's WhatsApp channel, trust in government's WhatsApp messages, likelihood of sharing government's WhatsApp messages, lockdown, local COVID-19 cases to date, age, gender, ethnicity, religion, marital status, educational level, house type, household | 0.002 | 0.09 | 0   |        |
| 2       | Chao M et al.     | 2020 | 4        | Internet based survey using Tencent questionnaire, through weChat                                                             | China                      | 2020–01–28                                      | 917   | Mean(SD): 24.59(9.5)                                                                        |                                                                                     | media use                                                       | sum of hours spent         | Anxiety | DASS-21                                                            | same as above                                                                                                                                                                                                                                                                                                                                                                                                       | 0.141 |      | 1   |        |
| 3       | Ruggieri S et al. | 2020 | 2        | online survey through a social media platform                                                                                 | Italian                    | between the 7th of March and 14th of April 2020 | 113   | mean(SD)<br>32.05 (80.1) at T1<br>32.13 (76.5) at T2<br>32.35 (78.7) at T3                  | 45 men and 68 women at T1<br>24 men and 51 women at T2<br>27 men and 53 women at T3 | average daily time spent on SNS                                 | Time spent on social media | anxiety | DASS-21                                                            |                                                                                                                                                                                                                                                                                                                                                                                                                     | 0.3   |      |     | SEM    |

< Supplementary material 1-1-3, (r) >

| study_n | author                  | year | n | surv_type                                                                                    | country                                 | survey period           | total | age                                            | sex                                                         | exposure                                  | exposure criteria                                                                                                                                                                                 | outcome        | outcome criteria                                                                                                                                                                                                                        | r     | p            |
|---------|-------------------------|------|---|----------------------------------------------------------------------------------------------|-----------------------------------------|-------------------------|-------|------------------------------------------------|-------------------------------------------------------------|-------------------------------------------|---------------------------------------------------------------------------------------------------------------------------------------------------------------------------------------------------|----------------|-----------------------------------------------------------------------------------------------------------------------------------------------------------------------------------------------------------------------------------------|-------|--------------|
| 1       | Chao M et al.           | 2020 | 4 | Internet based survey using Tencent questionnaire, through WeChat                            | China                                   |                         | 4385  | 917<br>Mean (SD): 24.59(9.5)                   |                                                             | media use, media engagement               | sum of hours spent                                                                                                                                                                                | Anxiety        | DASS-21                                                                                                                                                                                                                                 | 0.091 | p < 0.01     |
| 2       | Kazankizilkurt O et al. | 2020 | 4 | Online study, tool: SurveyMonkey (https://tr.surveymonkey.com/), snowball sampling technique | Turkey                                  | March 28-April 04, 2020 | 1046  | Mean age (SD), 37.1 (12.8), Range: 18-65       | Male: 690 (66.0), Female: 356 (34.0)                        | Time spent on social media during 2 weeks | "What is the time you spent on social media during the past 2 weeks?" (unit: hour)                                                                                                                | Anxiety        | HAS 18 -item self-report index, 3-point Likert scale (0-3, Range: 0-9)                                                                                                                                                                  | 0.19  | N/A (p<0.01) |
| 3       | Drouin M et al.         | 2020 | 4 | online survey via social media announcements and sharing via e-mail listservs                | U.S. residents at least 18 years of age | March 20-25, 2020       | 260   | Parents, Mean (SD): 40.07 (7.51); Range: 22-65 | Male: 31 (11.9) Female: 220 (84.6) Did not respond: 9 (3.5) | Social media/social tech to connect       | (1) Parent: Active social media use: 4-point Likert scale: 1 (No)-4 (Yes, a lot) (2) Child: social media/social tech to connect: 5-point Likert scale: 0 (Does not use technology)-4 (Yes, a lot) | Parent anxiety | 2 items from Patient Health Questionnaire-4 (PHQ-4): GAD-2, 4-point Likert scale ranging from 0 ("not at all") to 3 ("nearly every day"), Range: 0-6                                                                                    | 0.17  | p<0.01       |
| 4       | Drouin M et al.         | 2020 | 4 | online survey via social media announcements and sharing via e-mail listservs                | U.S. residents at least 18 years of age | March 20-25, 2020       | 260   | Parents, Mean (SD): 40.07 (7.51); Range: 22-65 | Male: 31 (11.9) Female: 220 (84.6) Did not respond: 9 (3.5) | Social media/social tech to connect       | (1) Parent: Active social media use: 4-point Likert scale: 1 (No)-4 (Yes, a lot) (2) Child: social media/social tech to connect: 5-point Likert scale: 0 (Does not use technology)-4 (Yes, a lot) | Child anxiety  | 1 item from Patient Health Questionnaire-4 (PHQ-4): 4-point Likert scale ranging from 0 ("not at all") to 3 ("nearly every day"), Range: 0-3 "Over the last 2 weeks, how often has YOUR CHILD (PEN) felt nervous, anxious, or on edge?" | 0.3   | p<0.001      |

| study_n | author              | year | st_design | surv_type                                                                                                    | country                                                                    | total                                                                                                         | case                                                                                                     | age                                                                                                | sex                                                       | exposure                                            | exposure criteria                                                                                                                                                                                                                                         | outcome                                                                                                                                                                 | outcome                                                            | adjustment                                                                                                                                                                                                                                                                                                                                                                                                         | or                                                                                                                                         | ci.lb | ci.ub |      |
|---------|---------------------|------|-----------|--------------------------------------------------------------------------------------------------------------|----------------------------------------------------------------------------|---------------------------------------------------------------------------------------------------------------|----------------------------------------------------------------------------------------------------------|----------------------------------------------------------------------------------------------------|-----------------------------------------------------------|-----------------------------------------------------|-----------------------------------------------------------------------------------------------------------------------------------------------------------------------------------------------------------------------------------------------------------|-------------------------------------------------------------------------------------------------------------------------------------------------------------------------|--------------------------------------------------------------------|--------------------------------------------------------------------------------------------------------------------------------------------------------------------------------------------------------------------------------------------------------------------------------------------------------------------------------------------------------------------------------------------------------------------|--------------------------------------------------------------------------------------------------------------------------------------------|-------|-------|------|
| 1       | Gao J et al.        | 2020 | 4         | Online survey among Chinese citizens aged ≥18 years                                                          | Chinese citizens aged ≥18 years (from 31 provinces and autonomous regions) | 4872                                                                                                          |                                                                                                          | Mean age, Mean (SD) 32.3 (10.0) Range: 18–85                                                       | Male: 1,560 (32.3) Female: 3,267 (67.7)                   | Social media exposure (SME)                         | During the past week, how often do you were exposed to news and information about COVID-19 on social media (such as Sina Weibo, Zhihu, Douban, WeChat and etc.) – 5-point Likert scale (1. Never – 5. Very often)/ Less vs. (1) Sometimes, (2) Frequently | Depression                                                                                                                                                              | The Chinese version of WHO-5 Well-Being Index (WHO5) (cut-off: 13) | gender, age (10-year categories), educational level (junior high school, senior high school, college and master and higher), marital status (recoded into married and other (including unmarried, divorced, and widowed)), self-rated health (categorized as excellent, very good and good or low), occupation (students/retired, health care worker and others), cities (Wuhan and others) area (urban and rural) | 1.18                                                                                                                                       | 0.96  | 1.45  |      |
| 2       | Lu P et al.         | 2020 | 4         | cross-sectional online study among citizens in Wuhan (via WeChat, QQ, and other social medianetworks)        | China (remotely among HWs and general public in Wuhan)                     | 1417                                                                                                          | 83 (21.7)                                                                                                | Age group, N(%) 18-25: 138 (9.7), 26-35: 441 (31.1), 31-40: 552 (39.0), >40: 286 (20.2)            | Male: 235 (16.6) Female: 1,182 (83.4)                     | Social media exposure (SME)                         | Few (reference), (1) sometime, (2) often in both healthcare workers and general public                                                                                                                                                                    | Depression                                                                                                                                                              | PHQ-9 (cut-off: 10)                                                | gender, age, marital status, educational level, income                                                                                                                                                                                                                                                                                                                                                             | 1.64                                                                                                                                       | 1.04  | 2.6   |      |
| 4       | Mohammadi MR et al. | 2020 | 4         | online questionnaire                                                                                         | Iranian citizens                                                           | 1881                                                                                                          | 713                                                                                                      | <20 42 (2.28) 21-30 390 (20.73) 31-40 758 (40.3) 41-50 422 (22.43) 51-60 210 (11.16) >61 59 (3.14) | Male 651 (34.61) Female 1,230 (65.39)                     | Media Consumption                                   | (1) during the past 2 weeks, to what extent did you obtain news and information about COVID-19 from national media?                                                                                                                                       | Depression                                                                                                                                                              | GHQ-28                                                             | demographic variables, public trust, media related variables, and prior anxiety to illness                                                                                                                                                                                                                                                                                                                         | 1.29                                                                                                                                       | 1.007 | 1.653 |      |
| 5       | Widiyanto A et al.  | 2020 | 4         | online survey                                                                                                | China                                                                      | 430                                                                                                           |                                                                                                          | Depression: No, 199 (46.28%); Yes, 231 (53.72%) Anxiety: No, 230 (53.49%); Yes, 200 (46.51%)       | < 20 190 (44.19) ≥20 240 (55.81)                          | Male 108 (25.12) Female 322 (74.88)                 | Social media exposure                                                                                                                                                                                                                                     | How often respondents during 3 months were exposed to news and information about COVID-19 on social media, such as Weibo, Television, Web, Whatsapp, Instagram and etc. | Depression                                                         | WHO-5                                                                                                                                                                                                                                                                                                                                                                                                              | gender, age, income, red area zone category (the existence of patients confirmed covid), implementation of Large-scale Social Restriction. | 1.64  | 1.05  | 2.57 |
| 6       | Lee Y et al.        | 2020 | 4         | Telephone/Wechat survey, national convenience sample of 2574 health care workers and 490 non-medical workers | China                                                                      | 3064                                                                                                          | N/A                                                                                                      | N/A                                                                                                | N/A                                                       | Social media use for COVID-19 information           | <3 (ref), ≥3 hours per day                                                                                                                                                                                                                                | Depression                                                                                                                                                              | PHQ-9 (cut-off: (1) 5, (2) 10)                                     | Not mentioned                                                                                                                                                                                                                                                                                                                                                                                                      | 1.475                                                                                                                                      | 1.167 | 1.865 |      |
| 7       | Ni MY et al.        | 2020 | 4         | online survey via WeChat                                                                                     | China                                                                      | 1791 community-based adults: probable anxiety n=376/probable depression n=303 health professionals: n=47/n=41 | community-based adults: probable anxiety n=376/probable depression n=303 health professionals: n=47/n=41 | 18-34 community-based adults: 38.6%, HCW: 58.9% 35-44 28.4% 33.6% >45 33.0% 7.5%                   | Men community-based adults: 39.2%, HCW: 31.2% Women 60.8% | Time spent on COVID-19 news on social media per day | (ref) Less than 1 hour (1) 1-2 hrs (2) 2 hrs or more                                                                                                                                                                                                      | Depression                                                                                                                                                              | PHQ-2                                                              | gender, marital status, educational level, employment, income                                                                                                                                                                                                                                                                                                                                                      | 3.08                                                                                                                                       | 2.16  | 4.4   |      |

| study_n | author            | year | st_design | surv_type                                                                                                                     | country                    | total | exposure                                                        | exposure criteria          | outcome    | outcome criteria                                                   | b         | se    | std |
|---------|-------------------|------|-----------|-------------------------------------------------------------------------------------------------------------------------------|----------------------------|-------|-----------------------------------------------------------------|----------------------------|------------|--------------------------------------------------------------------|-----------|-------|-----|
| 1       | Liu JQ et al.     | 2020 | 4         | Online survey (Participants responded to advertisements placed in Facebook/WhatsApp/community groups) aged at least 21 years. | Singapore adult population | 1145  | the amount of time spent receiving and discussing COVID-19 news | (unit: hours/day)          | Depression | Subscale scores of Depression, Anxiety, and Stress Scale (DASS-21) | 0.055     | 0.103 | 0   |
| 2       | Chao M et al.     | 2020 | 4         | internet based survey using Tencent questionnaire, through weChat                                                             | China                      | 917   | media use                                                       | sum of hours spent         | Depression | DASS-2                                                             | 0.088 N/A |       | 1   |
| 3       | Ruggieri S et al. | 2020 | 2         | online survey through a social media platform                                                                                 | Italian                    | 113   | average daily time spent on SNS                                 | Time spent on social media | Depression | DASS-21                                                            | 0.35 N/A  |       | 1   |

< Supplementary material 1-3-1, excluded studies, anxiety, Odds ratio >

| study_n | selec_no | no    | author              | year | st_design | surv_type            | country          | total | case | age                                                                                                               | sex                                      | exposure          | exposure criteria                                                                                                                                                   | outcome | outcome | adjustment                                                                                 | or    | ci.lb | ci.ub | excluded                         |
|---------|----------|-------|---------------------|------|-----------|----------------------|------------------|-------|------|-------------------------------------------------------------------------------------------------------------------|------------------------------------------|-------------------|---------------------------------------------------------------------------------------------------------------------------------------------------------------------|---------|---------|--------------------------------------------------------------------------------------------|-------|-------|-------|----------------------------------|
| 3       | 60       | PM111 | Mohammadi MR et al. | 2020 | 4         | online questionnaire | Iranian citizens | 1881  | 713  | <20 42 (2.23)<br>21-30 390 (20.73)<br>31-40 758 (40.3)<br>41-50 422 (22.43)<br>51-60 210 (11.16)<br>>61 59 (3.14) | Male 651 (34.61)<br>Female 1,230 (65.39) | Media Consumption | (1) during the past 2 weeks, to what extent did you obtain news and information about COVID-19 from national media? Likert 5 point scale "0-never" to "4-very much" | anxiety | GHQ-28  | demographic variables, public trust, media related variables, and prior anxiety to illness | 1.513 | 1.222 | 1.872 | Heterogeneous exposure variables |

| study.n | selec_no | no        | author                   | year | st design | surv_type                                                                                    | country                                 | survey period                     | total | case                                | age                                                                                                                     | sex                                                            | exposure                                                                  | exposure criteria                                                                                                                                                                                               | outcome             | outcome criteria                                                                                                                                                                                                                                  | adjustment                                                                                                                   | b     | se            | std | others               | excluded                           |
|---------|----------|-----------|--------------------------|------|-----------|----------------------------------------------------------------------------------------------|-----------------------------------------|-----------------------------------|-------|-------------------------------------|-------------------------------------------------------------------------------------------------------------------------|----------------------------------------------------------------|---------------------------------------------------------------------------|-----------------------------------------------------------------------------------------------------------------------------------------------------------------------------------------------------------------|---------------------|---------------------------------------------------------------------------------------------------------------------------------------------------------------------------------------------------------------------------------------------------|------------------------------------------------------------------------------------------------------------------------------|-------|---------------|-----|----------------------|------------------------------------|
| 1       |          | 23 PM219  | Drouin M et al.          | 2020 | 4         | online survey via social media announcements and sharing via e-mail listervs                 | U.S. residents at least 18 years of age | March 20-25, 2020                 | 260   |                                     | Parents, Mean (SD): 40.07 (7.51); Range=22-62                                                                           | Male: 31 (11.9)<br>Female: 220 (84.6) Did not respond: 9 (3.5) | Social media/social tech to connect                                       | (1) <b>Parent:</b> Active social media use; 4-point Likert scale; 1 (No)-4 (Yes, a lot) (2) <b>Child:</b> social media/social tech to connect; 5-point Likert scale; 0 (Does not use technology)-4 (Yes, a lot) | Parent anxiety      | <b>2 items from Patient Health Questionnaire-4 (PHQ-4):</b> GAD-2, 4-point Likert scale ranging from 0 ("not at all") to 3 ("nearly every day"), Range: 0-6                                                                                       | None                                                                                                                         | 0.17  | N/A (p<0.01)  | 1   | SEM                  | Heterogeneous exposure measurement |
| 2       |          | 23 PM219  | Drouin M et al.          | 2020 | 4         | online survey via social media announcements and sharing via e-mail listervs                 | U.S. residents at least 18 years of age | March 20-25, 2020                 | 260   |                                     | Parents, Mean (SD): 40.07 (7.51); Range=22-62                                                                           | Male: 31 (11.9)<br>Female: 220 (84.6) Did not respond: 9 (3.5) | Social media/social tech to connect                                       | (1) <b>Parent:</b> Active social media use; 4-point Likert scale; 1 (No)-4 (Yes, a lot) (2) <b>Child:</b> social media/social tech to connect; 5-point Likert scale; 0 (Does not use technology)-4 (Yes, a lot) | Child anxiety       | <b>1 items from Patient Health Questionnaire-4 (PHQ-4):</b> 4-point Likert scale ranging from 0 ("not at all") to 3 ("nearly every day"), Range: 0-3 ("Over the last 2 weeks, how often has YOUR CHILD (REN) felt nervous, anxious, or on edge?") | None                                                                                                                         | 0.11  | N/A (p<0.05)  | 1   | SEM                  | Heterogeneous exposure measurement |
| 3       |          | 90 PM048  | Soroya SH et al.         | 2020 | 4         | web-based questionnaire in Webropol                                                          | Finland                                 | from April 4th to April 29th      | 321   |                                     | <20 29 (9%)<br>21-25 133 (41%)<br>26-34 68 (21%)<br>35-44 43 (13%)<br>45-54 29 (9%)<br>>55 19 (6%)                      | Male 133 (41%)<br>Female 179 (56%)                             | Social Media                                                              | Frequency/<br>6-point scale [1 = never, 2 = less than one hour, 3 = 1-2 h, 4 = 3-4 h, 5 = 5-6 h, 6 = more than 6 h]                                                                                             | information anxiety | 5-point Likert scale from 1 ("strongly disagree") to 5 ("strongly agree")                                                                                                                                                                         | None                                                                                                                         | 0.114 | 0.053         |     | SEM                  | Heterogeneous exposure measurement |
| 4       |          | 36 PM164  | Kazan Kızılkurt O et al. | 2020 | 4         | Online study, tool: SurveyMonkey (https://tr.surveymonkey.com/), snowball sampling technique | Turkey                                  | March 28-April 04, 2020           | 1,046 | Psychiatric treatment history (25%) | Mean age (SD), 37.1 (12.8), Range: 18-65                                                                                | Male: 690 (66.0), Female: 356 (34.0)                           | Time spent on social media during 2 weeks                                 | "What is the time you spent on social media during the past 2 weeks?" (Less than 1 h 1-3 h 4-6 h More than 7 h)                                                                                                 | Anxiety             | HAS, 18-item self-report index, 3-point Likert scale (0-3), Range: 0-54                                                                                                                                                                           | Chronic medical disease, psychiatric treatment history, perception of self, BHS, duration following coronavirus related news | 0.01  | N/A (p=0.002) | 1   |                      | Heterogeneous exposure measurement |
| 5       |          | 46 PM138  | Liu C et al.             | 2020 | 4         | Online survey by a data-collection service provider (i.e., Changsha Ranxing IT Ltd.)         | China (30 provinces in mainland China)  | The first two weeks of April 2020 | 1,118 |                                     | Age group (%),<br>Below 18 4.1%<br>18-25 30.6%<br>26-30 22.6%<br>31-35 23.5%<br>36-40 9%<br>41-50 7.6%<br>Above 50 2.5% | Male: 45.9%<br>Female: 54.1%                                   | Media use during the pandemic of COVID-19 (from late January to February) | Time spent on coronavirus information each day, 5-point Likert scale (1, hardly ever-5, more than 5 hours/day)                                                                                                  | Anxiety (outcome)   | 3-items 5-point Likert scale; adapted from Self-Rating Anxiety Scale (SAS), Range: 3-15                                                                                                                                                           | Time Spent on COVID-19 Information controlled, <b>media vicarious traumatization</b>                                         | -0.02 | N/A (p>0.05)  | 0   | Mediation            | Heterogeneous exposure measurement |
| 9       |          | 105 PM007 | Zhao N et al.            | 2020 | 4         | online survey                                                                                | China                                   | 24 March to 1 April 2020          | 512   |                                     | Mean(SD) 22.12 (2.47)                                                                                                   | male 192 (37.5%)<br>female 320 (62.5%)                         | social media use                                                          | summing up the total daily hours                                                                                                                                                                                | Anxiety             | GAD-7                                                                                                                                                                                                                                             | traditional and internet media usage                                                                                         | 0.12  |               | 1   | CI or t not provided | Heterogeneous exposure measurement |

< Supplementary material 1-3-3, excluded studies, depression, beta >

| study_n | selec_no | no    | author        | year | st_design | surv_type     | country | survey period            | total | age                   | sex                                    | exposure         | exposure criteria                | outcome    | outcome criteria | adjustment    | b    | std | others               | excluded                           |
|---------|----------|-------|---------------|------|-----------|---------------|---------|--------------------------|-------|-----------------------|----------------------------------------|------------------|----------------------------------|------------|------------------|---------------|------|-----|----------------------|------------------------------------|
| 4       | 105      | PM007 | Zhao N et al. | 2020 | 4         | online survey | China   | 24 March to 1 April 2020 | 512   | Mean(SD) 22.12 (2.47) | male 192 (37.5%)<br>female 320 (62.5%) | social media use | summing up the total daily hours | Depression | PHQ-9            | same as above | 0.11 | 1   | CI or t not provided | Heterogeneous exposure measurement |

< Supplementary material 1-3-4, excluded studies, depression, Odds ratio >

| study_n | selec_no | no    | author              | year | st_design | surv_type            | country          | survey period                           | total | case | age                                                                                                               | sex                                      | exposure          | exposure criteria                                                                                                   | outcome    | outcome | adjustment                                                                                 | or   | ci.lb | ci.ub | excluded                                        |
|---------|----------|-------|---------------------|------|-----------|----------------------|------------------|-----------------------------------------|-------|------|-------------------------------------------------------------------------------------------------------------------|------------------------------------------|-------------------|---------------------------------------------------------------------------------------------------------------------|------------|---------|--------------------------------------------------------------------------------------------|------|-------|-------|-------------------------------------------------|
| 4       | 60       | PM111 | Mohammadi MR et al. | 2020 | 4         | online questionnaire | Iranian citizens | between March 5, 2020 to March 22, 2020 | 1881  | 713  | <20 42 (2.23)<br>21-30 390 (20.73)<br>31-40 758 (40.3)<br>41-50 422 (22.43)<br>51-60 210 (11.16)<br>>61 59 (3.14) | Male 651 (34.61)<br>Female 1,230 (65.39) | Media Consumption | (1) during the past 2 weeks, to what extent did you obtain news and information about COVID-19 from national media? | Depression | GHQ-28  | demographic variables, public trust, media related variables, and prior anxiety to illness | 1.29 | 1.007 | 1.653 | No description of exposure variable measurement |

(a) Anxiety (Regression coefficients)

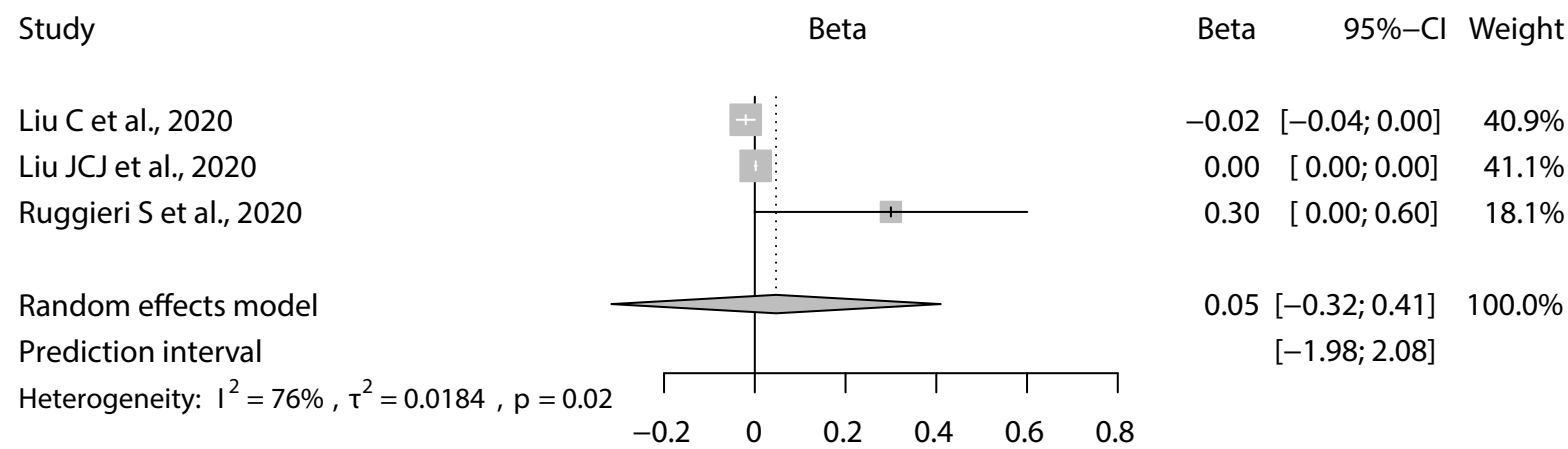

(b) Anxiety (Pearson's)

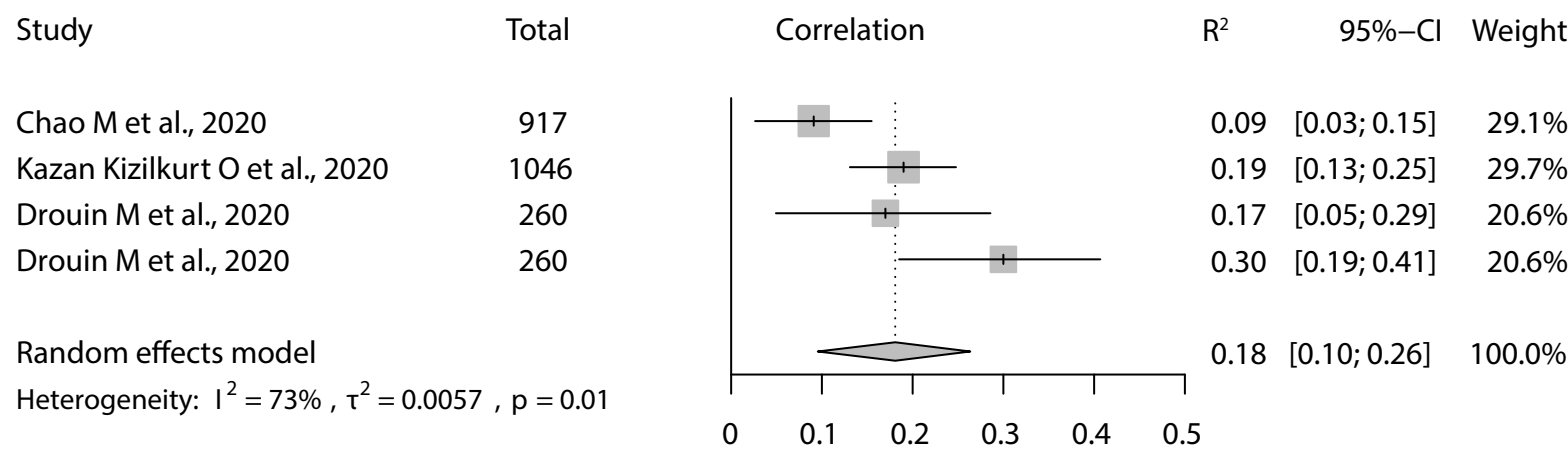

(c) Depression (Pearson's r)

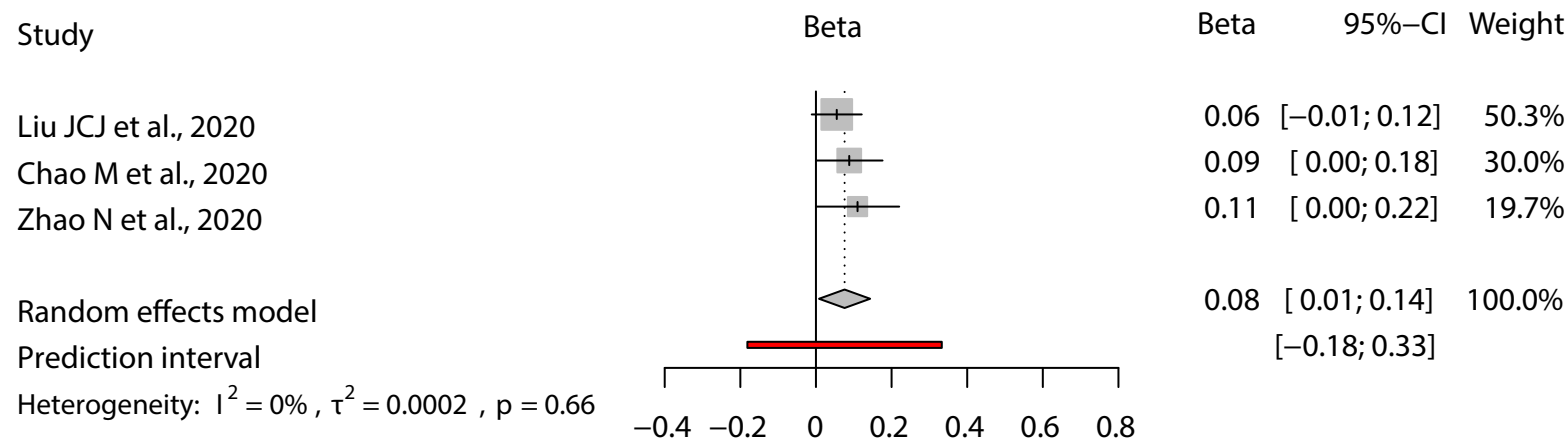

**Supplementary material 2.** Forest plots for social media exposure and risk of mental health outcomes (i.e. anxiety and depression) in cross-sectional studies.

<Supplementary Material 3-1. Risk of Bias of cohort studies by RoBANS>

|               | study, year                    | 1. selection of participants | 2. Confounding | 3. Measurement of exposure | 4. Blinding of outcome assessments | 5. Incomplete outcome data | 6. Selective outcome reporting | overall | weight |
|---------------|--------------------------------|------------------------------|----------------|----------------------------|------------------------------------|----------------------------|--------------------------------|---------|--------|
| OR_Anxiety    |                                |                              |                |                            |                                    |                            |                                |         |        |
|               | Widiyanto A et al., 2020       | Low                          | Low            | High                       | Low                                | Unclear                    | Low                            | Low     | 6.3    |
|               | Su J et al., 2020              | Low                          | Low            | High                       | Low                                | Low                        | Low                            | Low     | 10.1   |
|               | Ni MY et al., 2020             | Low                          | Unclear        | High                       | Low                                | Unclear                    | Low                            | High    | 17     |
|               | Lu P et al., 2020              | Low                          | Low            | High                       | Low                                | Unclear                    | Low                            | Low     | 13     |
|               | Hossain T et al., 2020         | Low                          | Low            | High                       | Low                                | Low                        | Unclear                        | Low     | 14.5   |
|               | Gao J et al., 2020             | Low                          | Low            | High                       | Low                                | Low                        | Low                            | Low     | 19.5   |
| OR_Depression |                                |                              |                |                            |                                    |                            |                                |         |        |
|               | Widiyanto A et al., 2020       | High                         | Low            | High                       | Low                                | Unclear                    | Low                            | High    | 11.6   |
|               | Ni MY et al., 2020             | Low                          | Unclear        | High                       | Low                                | Unclear                    | Low                            | Low     | 14.6   |
|               | Mohammadi MR et al., 2020      | Low                          | Low            | High                       | Low                                | Unclear                    | Low                            | Low     | 14.9   |
|               | Lu P et al., 2020              | Low                          | Low            | High                       | Low                                | Unclear                    | Low                            | Low     | 13.6   |
|               | Lee Y et al., 2020             | Low                          | Low            | High                       | Low                                | Unclear                    | Low                            | Low     | 15.1   |
|               | Gao J et al., 2020             | High                         | Low            | High                       | Low                                | Low                        | Low                            | Low     | 16.1   |
| B_Anxiety     |                                |                              |                |                            |                                    |                            |                                |         |        |
|               | Chao M et al., 2020            | High                         | Unclear        | High                       | Low                                | Unclear                    | Low                            | Low     | 8.5    |
|               | Ruggieri S et al., 2020        | Unclear                      | Low            | High                       | Low                                | Low                        | Low                            | Low     | 3.4    |
|               | Liu JCJ et al., 2020           | High                         | Low            | High                       | Low                                | Low                        | Low                            | Low     | 15.2   |
| B_Depression  |                                |                              |                |                            |                                    |                            |                                |         |        |
|               | Chao M et al., 2020            | Low                          | Unclear        | High                       | Low                                | Unclear                    | Low                            | High    | 31     |
|               | Ruggieri S et al., 2020        | Unclear                      | Low            | High                       | Low                                | Low                        | Low                            | Low     | 27.5   |
|               | Liu JCJ et al., 2020           | High                         | Low            | High                       | Low                                | Low                        | Low                            | High    | 34.5   |
| B_Stress      |                                |                              |                |                            |                                    |                            |                                |         |        |
|               | Chao M. et al., 2020           | Unclear                      | Unclear        | High                       | Low                                | Unclear                    | Low                            | High    | 10.6   |
|               | Ruggieri S et al., 2020        | Low                          | Low            | High                       | Low                                | Low                        | Low                            | Low     | 7.9    |
|               | Liu JCJ et al., 2020           | Low                          | Low            | High                       | Low                                | Low                        | Low                            | Low     | 11     |
| R_Anxiety     |                                |                              |                |                            |                                    |                            |                                |         |        |
|               | Chao M et al., 2020            | Unclear                      | Unclear        | High                       | Low                                | Unclear                    | Low                            | High    | 29.1   |
|               | Kazan Kizilkurt O et al., 2020 | Unclear                      | High           | High                       | Low                                | Unclear                    | Low                            | High    | 29.7   |
|               | Drouin M et al., 2020          | Low                          | Low            | High                       | Low                                | Low                        | Low                            | Low     | 20.6   |
|               | Drouin M et al., 2020          | Low                          | Low            | High                       | Low                                | Low                        | Low                            | Low     | 20.6   |
| R_Stress      |                                |                              |                |                            |                                    |                            |                                |         |        |
|               | Chao M et al., 2020            | High                         | Unclear        | High                       | Low                                | Unclear                    | Low                            | High    | 34.2   |
|               | Hong W et al., 2020            | Low                          | High           | High                       | Low                                | Low                        | Low                            | Low     | 26.1   |
|               | Drouin M et al., 2020          | Low                          | Low            | High                       | Low                                | Low                        | Low                            | Low     | 19.8   |
|               | Drouin M et al., 2020          | Low                          | Low            | High                       | Low                                | Low                        | Low                            | Low     | 19.8   |

<Supplemenatry Material 3-2. Risk of Bias of cohort studies by RoBANS>

|               | study, year                    | 1. selection of participants | 2. Confounding | 3. Measurement of exposure | 4. Blinding of outcome assessments | 5. Incomplete outcome data | 6. Selective outcome reporting | overall | weight |
|---------------|--------------------------------|------------------------------|----------------|----------------------------|------------------------------------|----------------------------|--------------------------------|---------|--------|
| OR_Anxiety    |                                |                              |                |                            |                                    |                            |                                |         |        |
|               | Widiyanto A et al., 2020       | Low                          | Low            | High                       | Low                                | Uncertain                  | Low                            | Low     | 6.3    |
|               | Su J et al., 2021              | Low                          | High           | High                       | Low                                | High                       | Low                            | High    | 10.1   |
|               | NI MY et al., 2020             | Low                          | High           | High                       | Low                                | Uncertain                  | Low                            | High    | 17     |
|               | Lu P et al., 2021              | Low                          | Low            | High                       | Low                                | Low                        | Low                            | Low     | 13     |
|               | Hossain T et al., 2021         | Low                          | Low            | High                       | Low                                | Low                        | Low                            | Low     | 14.5   |
|               | Gao J et al., 2021             | Low                          | Low            | High                       | Low                                | Uncertain                  | Low                            | Low     | 19.5   |
| OR_Depressior |                                |                              |                |                            |                                    |                            |                                |         |        |
|               | Widiyanto A et al., 2020       | High                         | Low            | High                       | Low                                | Uncertain                  | Low                            | High    | 11.6   |
|               | NI MY et al., 2020             | Low                          | High           | High                       | Low                                | Uncertain                  | Low                            | High    | 14.6   |
|               | Mohammadi MR et al., 2020      | High                         | Low            | High                       | Low                                | High                       | Low                            | High    | 14.9   |
|               | Lu P et al., 2021              | Low                          | Low            | High                       | Low                                | Low                        | Low                            | Low     | 13.6   |
|               | Lee Y et al., 2021             | Low                          | Uncertain      | High                       | Low                                | Uncertain                  | Low                            | Low     | 15.1   |
|               | Gao J et al., 2021             | High                         | Low            | High                       | Low                                | Uncertain                  | Low                            | High    | 16.1   |
| B_Anxiety     |                                |                              |                |                            |                                    |                            |                                |         |        |
|               | Chao M et al., 2021            | Low                          | Low            | Low                        | Low                                | Uncertain                  | Low                            | Low     | 8.5    |
|               | Ruggieri S et al., 2021        | Low                          | High           | High                       | Low                                | High                       | Low                            | High    | 3.4    |
|               | Liu JCJ et al., 2021           | Low                          | Low            | Low                        | Low                                | High                       | Low                            | Low     | 15.2   |
| B_Depressior  |                                |                              |                |                            |                                    |                            |                                |         |        |
|               | Chao M et al., 2021            | Low                          | Low            | Low                        | Low                                | Uncertain                  | Low                            | Low     | 31     |
|               | Ruggieri S et al., 2021        | Low                          | High           | High                       | Low                                | High                       | Low                            | High    | 27.5   |
|               | Liu JCJ et al., 2021           | Low                          | Low            | Low                        | Low                                | High                       | Low                            | Low     | 34.5   |
| B_Stres:      |                                |                              |                |                            |                                    |                            |                                |         |        |
|               | Chao M. et al., 2021           | Low                          | Low            | Low                        | Low                                | Uncertain                  | Low                            | Low     | 10.6   |
|               | Ruggieri S et al., 2021        | Low                          | High           | High                       | Low                                | High                       | Low                            | High    | 7.9    |
|               | Liu JCJ et al., 2021           | Low                          | Low            | Low                        | Low                                | High                       | Low                            | Low     | 11     |
| R_Anxiety     |                                |                              |                |                            |                                    |                            |                                |         |        |
|               | Chao M et al., 2021            | Low                          | Low            | Low                        | Low                                | Uncertain                  | Low                            | Low     | 29.1   |
|               | Kazan Kizilkurt O et al., 2021 | Low                          | Low            | High                       | Low                                | Uncertain                  | Low                            | Low     | 29.7   |
|               | Drouin M et al., 2020          | Low                          | High           | Low                        | Low                                | Uncertain                  | Low                            | Low     | 20.6   |
|               | Drouin M et al., 2020          | Low                          | High           | Low                        | Low                                | Uncertain                  | Low                            | Low     | 20.6   |
| R_Stres:      |                                |                              |                |                            |                                    |                            |                                |         |        |
|               | Chao M et al., 2021            | Low                          | Low            | Low                        | Low                                | Uncertain                  | Low                            | Low     | 34.2   |
|               | Hong W et al., 2021            | Low                          | High           | Low                        | Low                                | Uncertain                  | Low                            | Low     | 26.1   |
|               | Drouin M et al., 2020          | Low                          | High           | Low                        | Low                                | Uncertain                  | Low                            | Low     | 19.8   |
|               | Drouin M et al., 2020          | Low                          | High           | Low                        | Low                                | Uncertain                  | Low                            | Low     | 19.8   |

**Supplementary material 4-1. Results for publication bias <sup>a</sup>**

| <b>Outcome</b>             | <b>Studies, n</b> | <b>Intercept [95% CI]</b> | <b>t-value</b> | <b>p-value</b> |
|----------------------------|-------------------|---------------------------|----------------|----------------|
| Estimates                  | (participants)    |                           |                |                |
| <b>Anxiety symptoms</b>    |                   |                           |                |                |
| Odds ratio                 | 6 (9,579)         | -1.14 [-5.46-3.19]        | -0.51          | 0.63           |
| Regression coefficients    | 3 (2,376)         | 0.03 [-4.25-4.31]         | 0.01           | 0.99           |
| Correlation coefficients   | 4 (2,483)         | 2.85 [-3.55-9.24]         | 0.87           | 0.48           |
| <b>Depressive symptoms</b> |                   |                           |                |                |
| Odds ratio                 | 6 (13,241)        | -1.14 [-5.46-3.19]        | -0.51          | 0.63           |
| Regression coefficients    | 3 (2,574)         | 2.53 [1.98-3.07]          | 9.07           | 0.07           |

CI- Confidence Interval

<sup>a</sup> Publication bias was tested with Egger's test

(a) anxiety

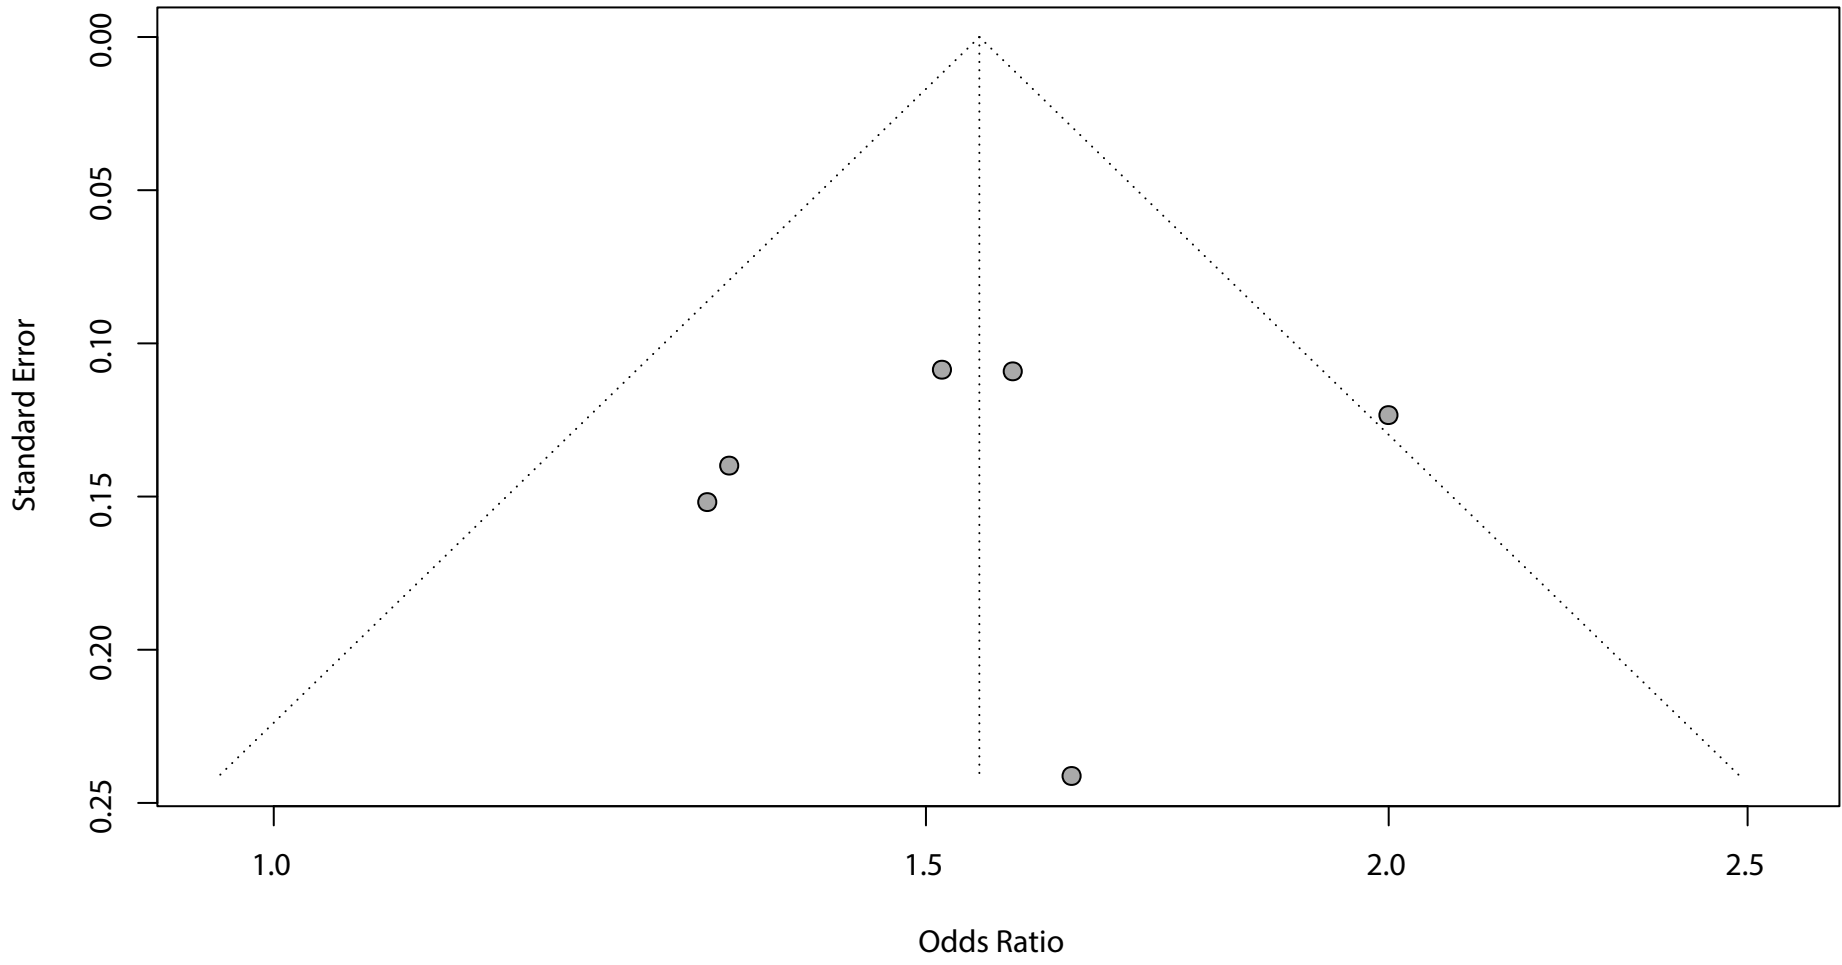

(b) depression

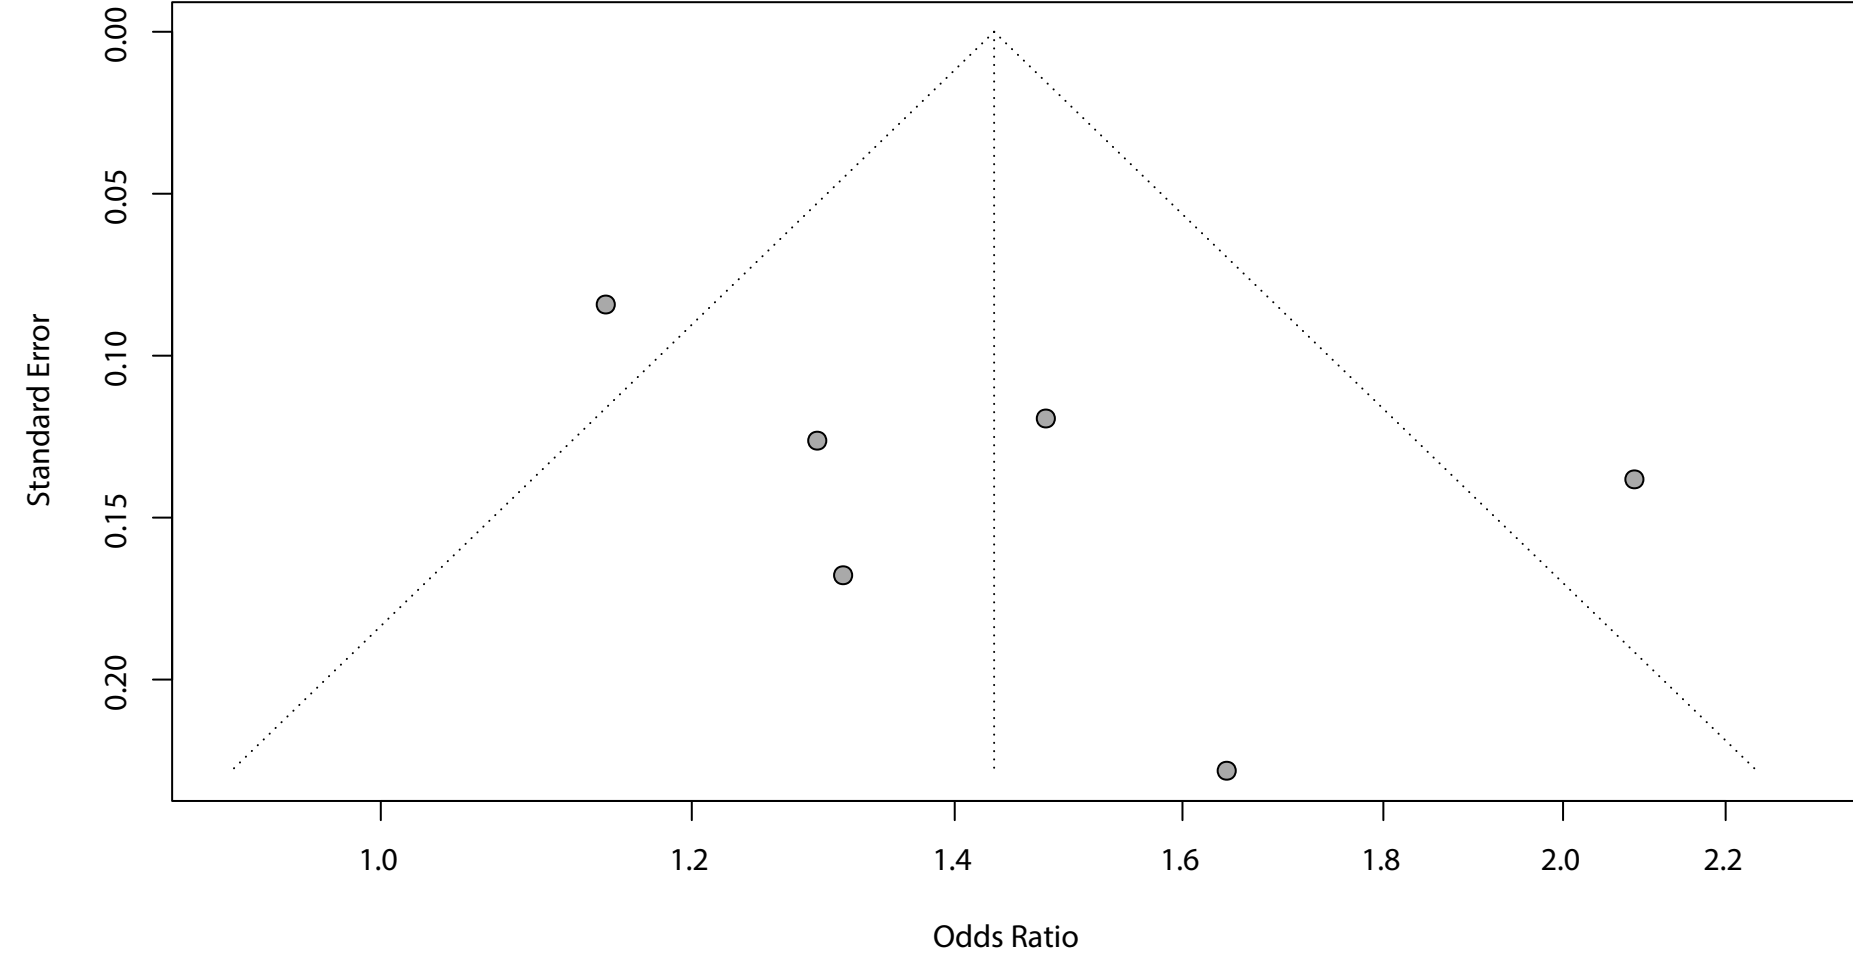

(c) stress

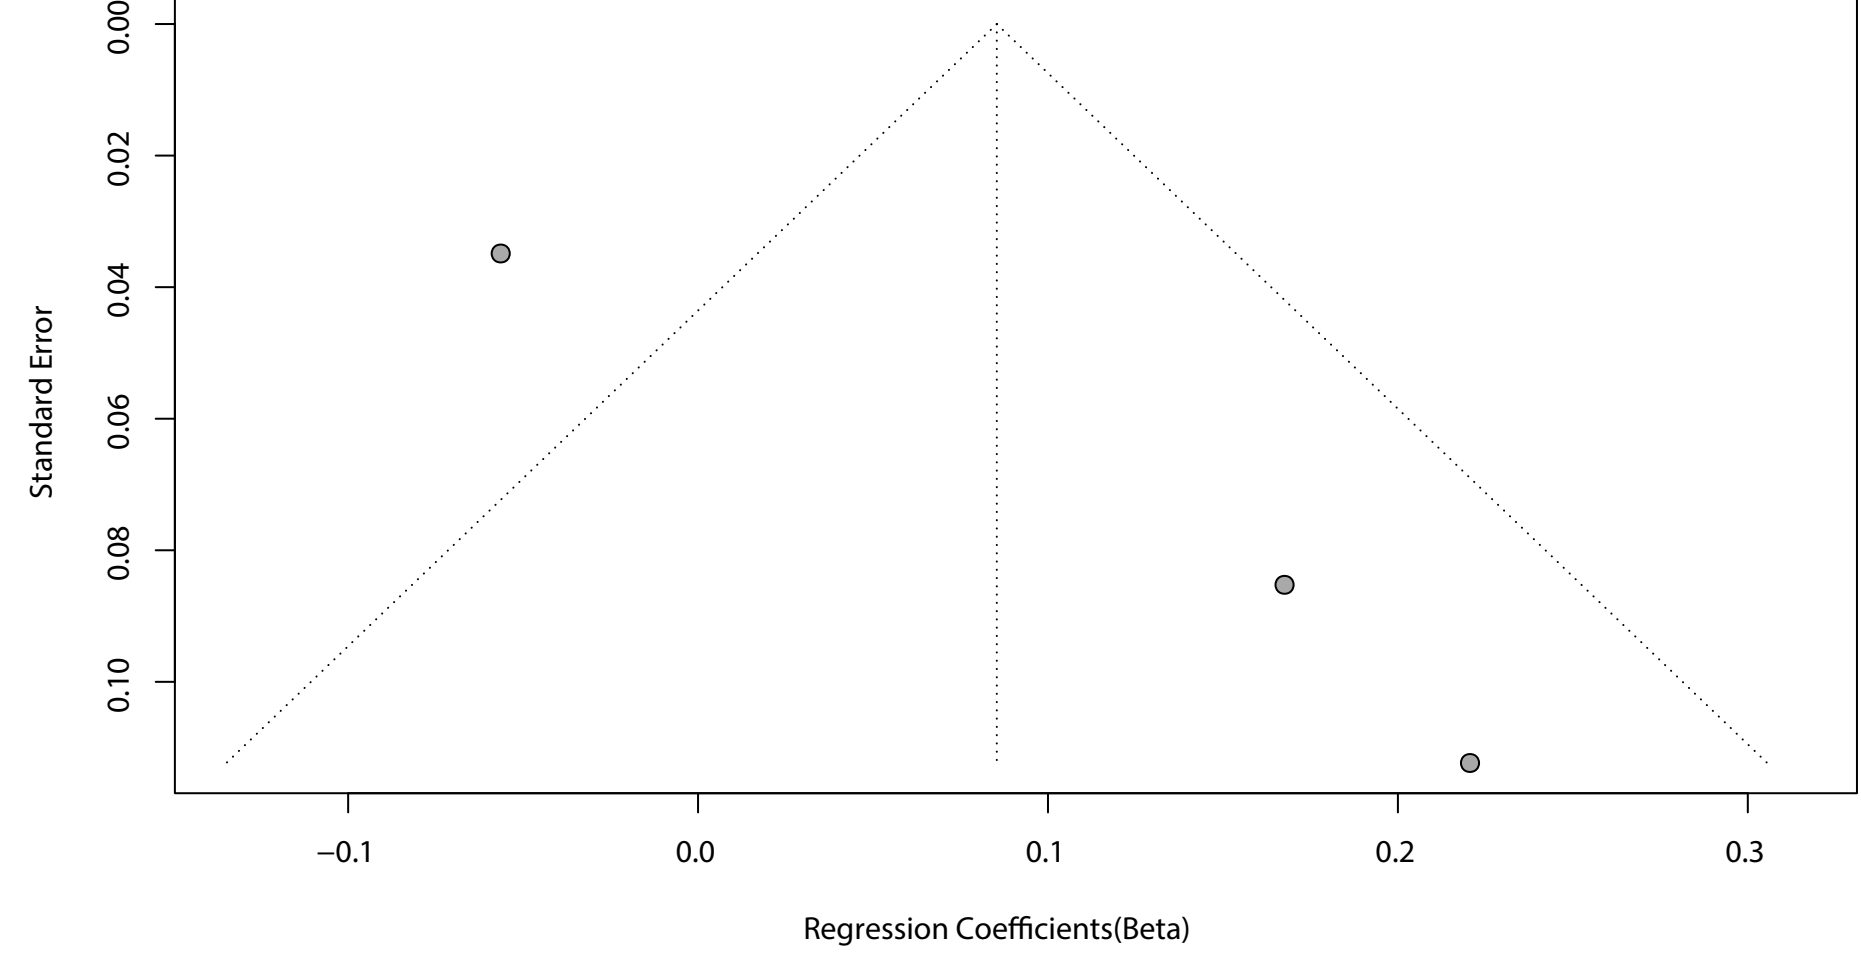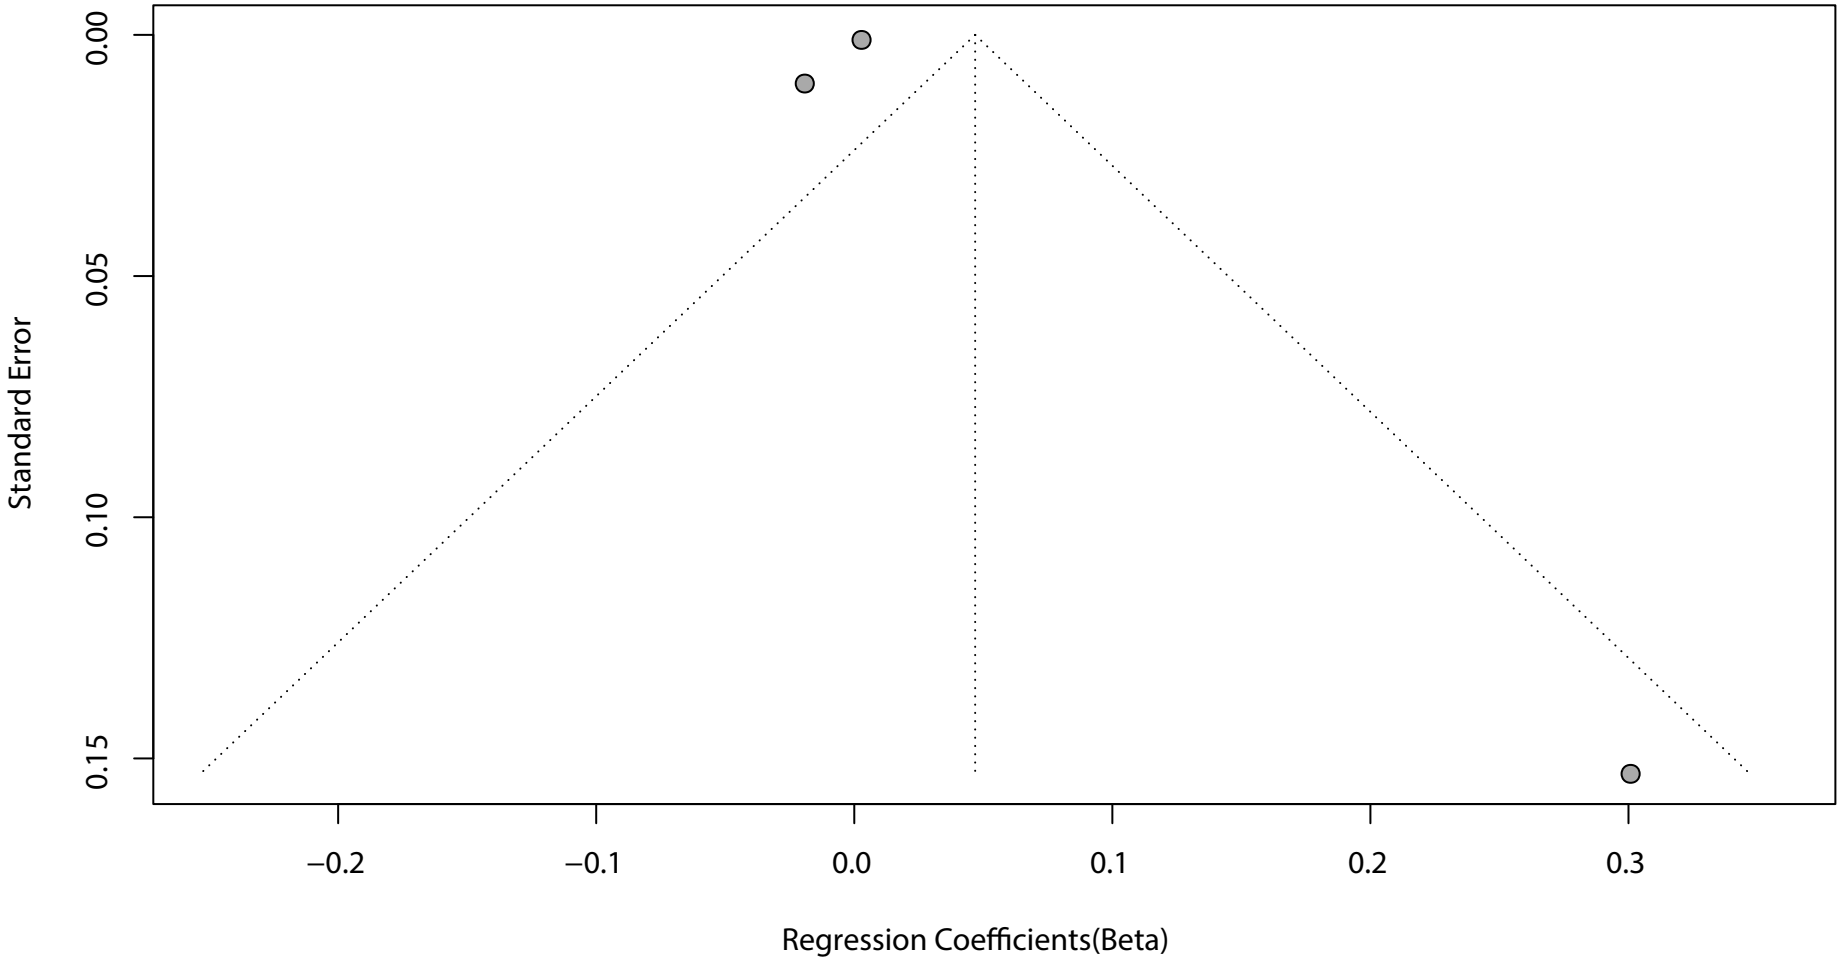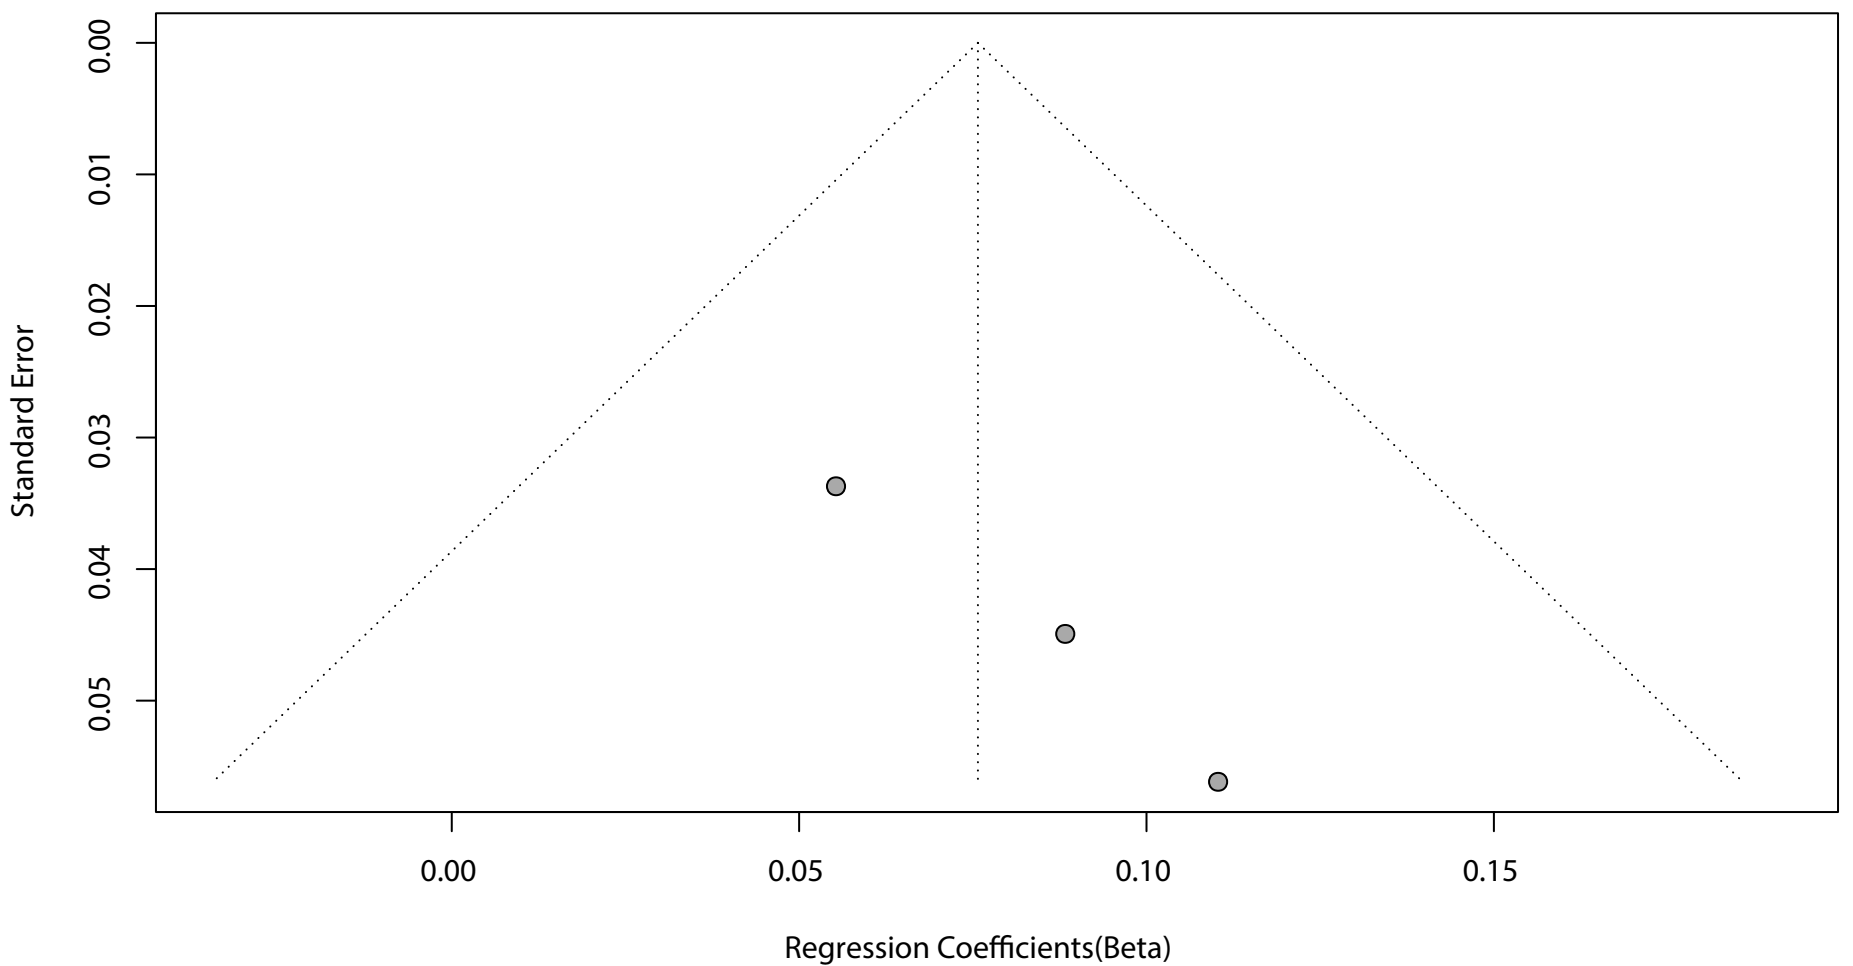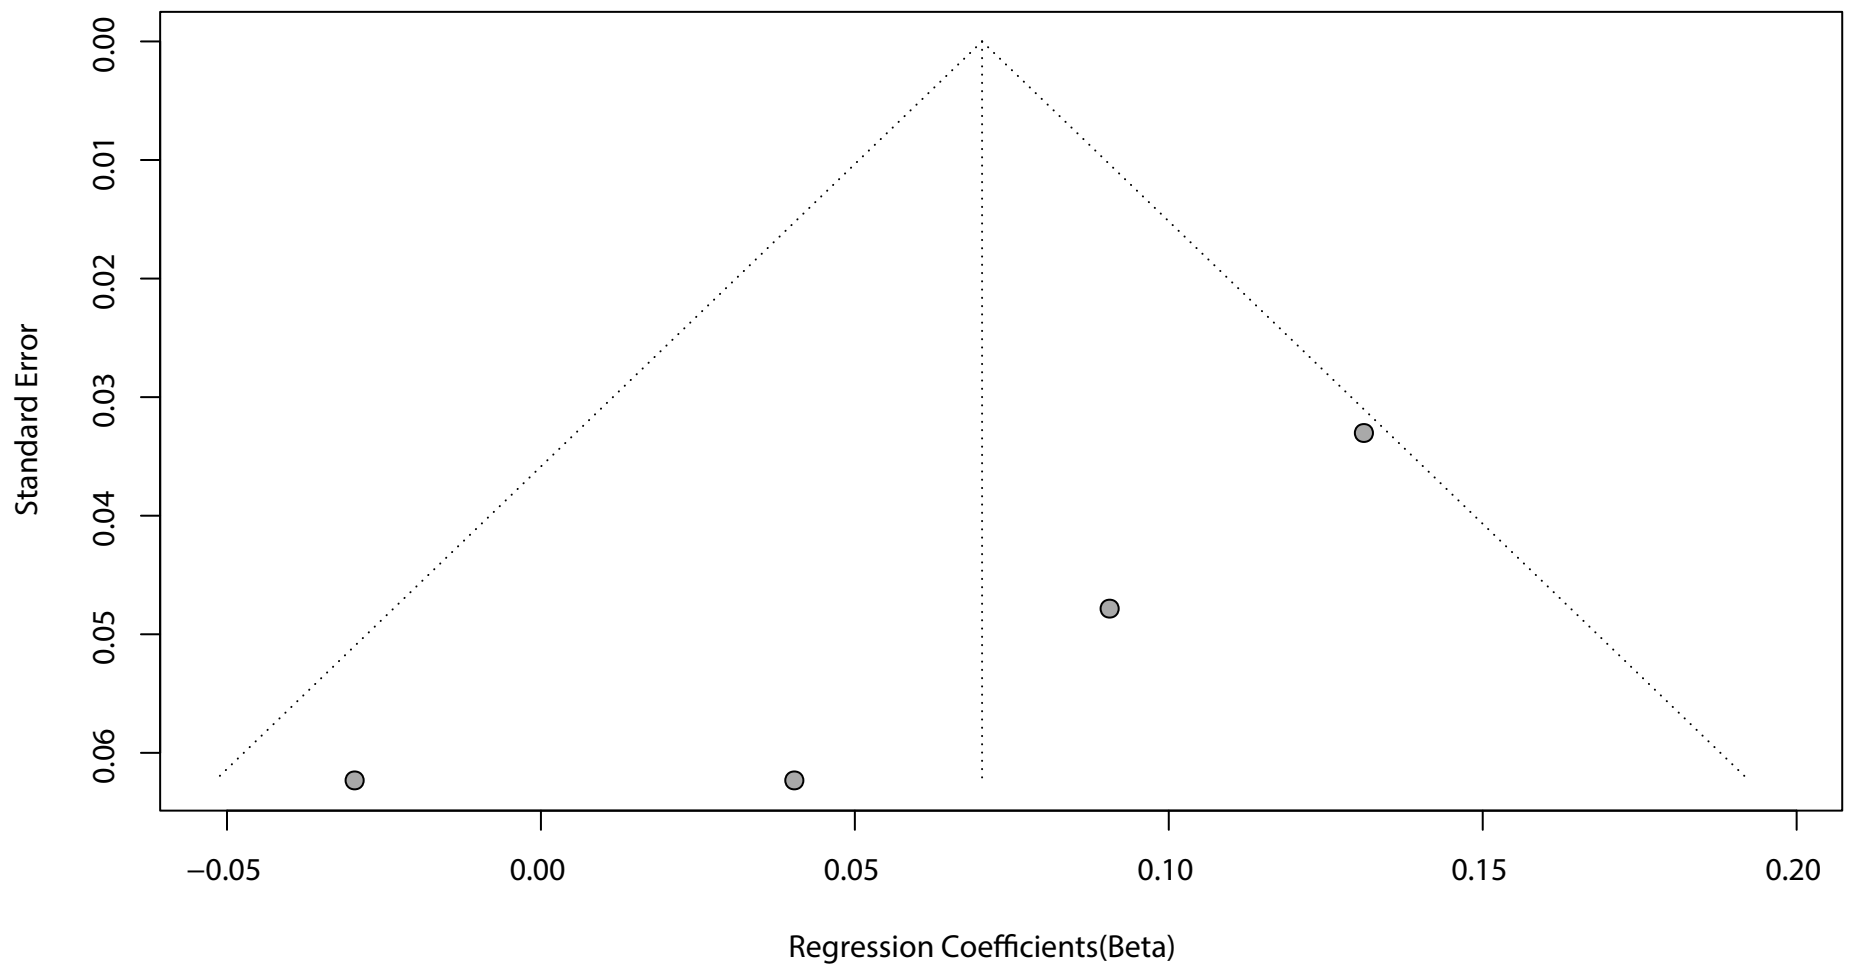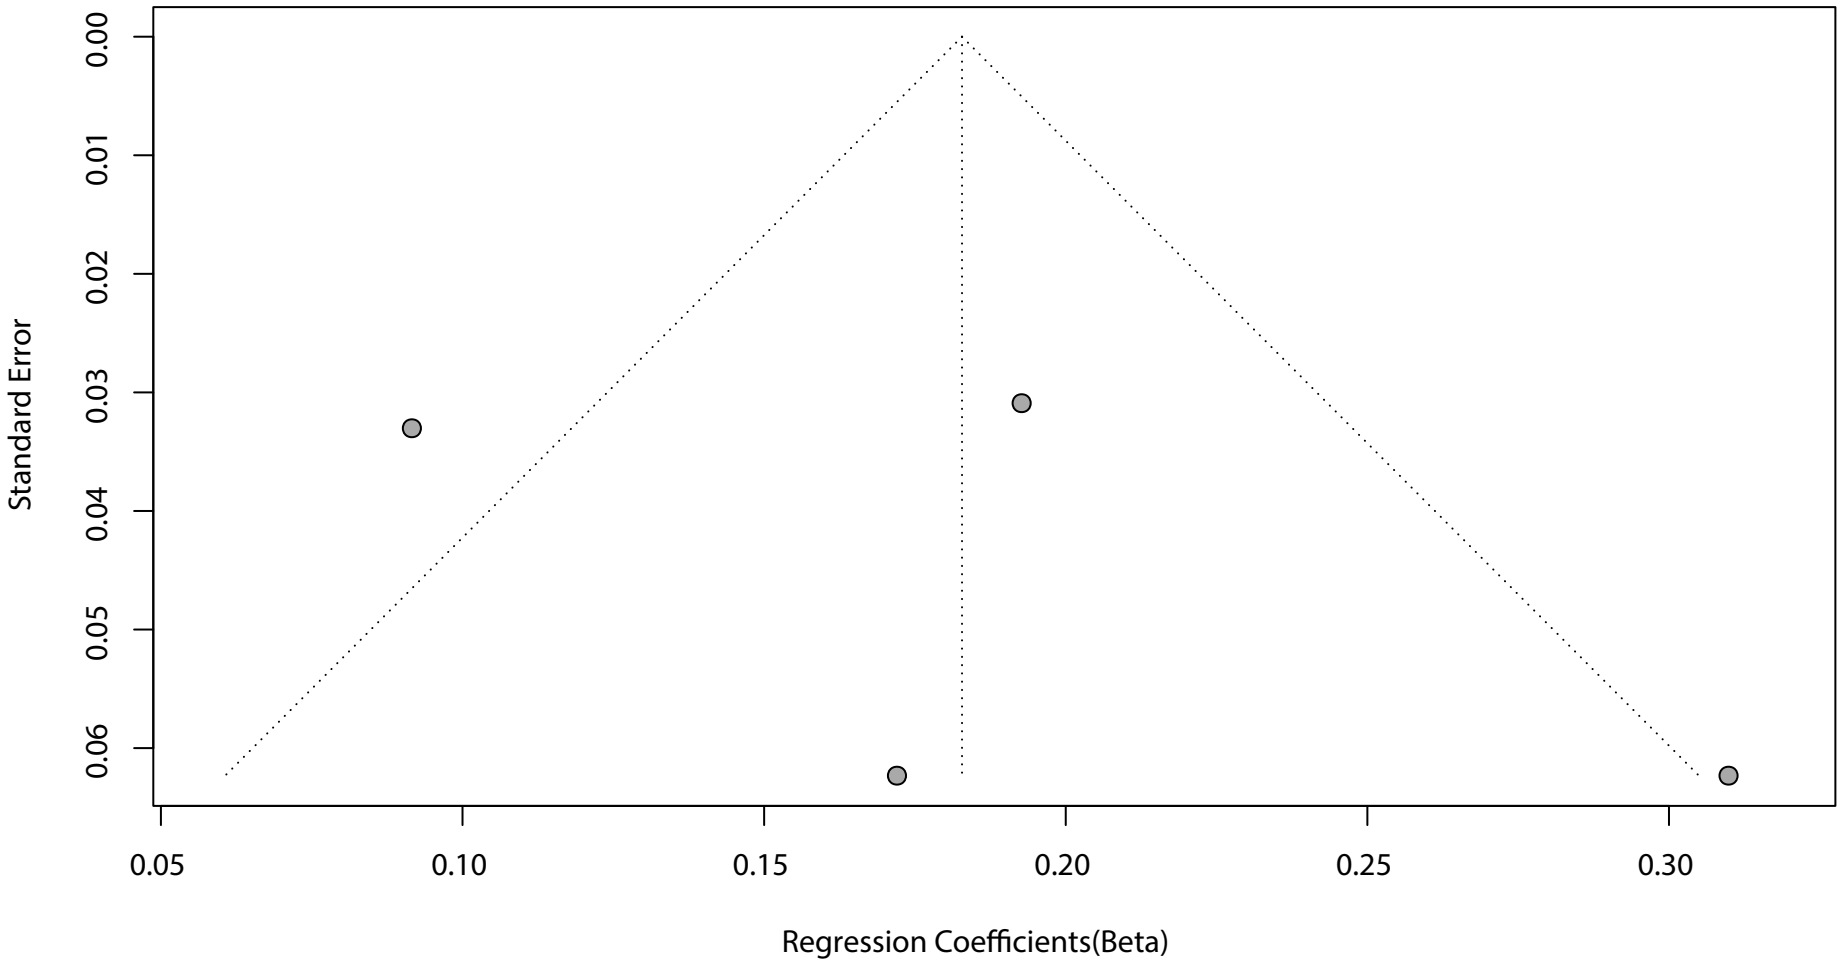

**Supplementary Material. 4-2** Funnel plots for publication bias on relationship between social media exposure time and risk of various mental health symptoms in case-control studies. Each column represents funnel plots of (a) anxiety, (b) depression, and (c) stress.

(a) anxiety

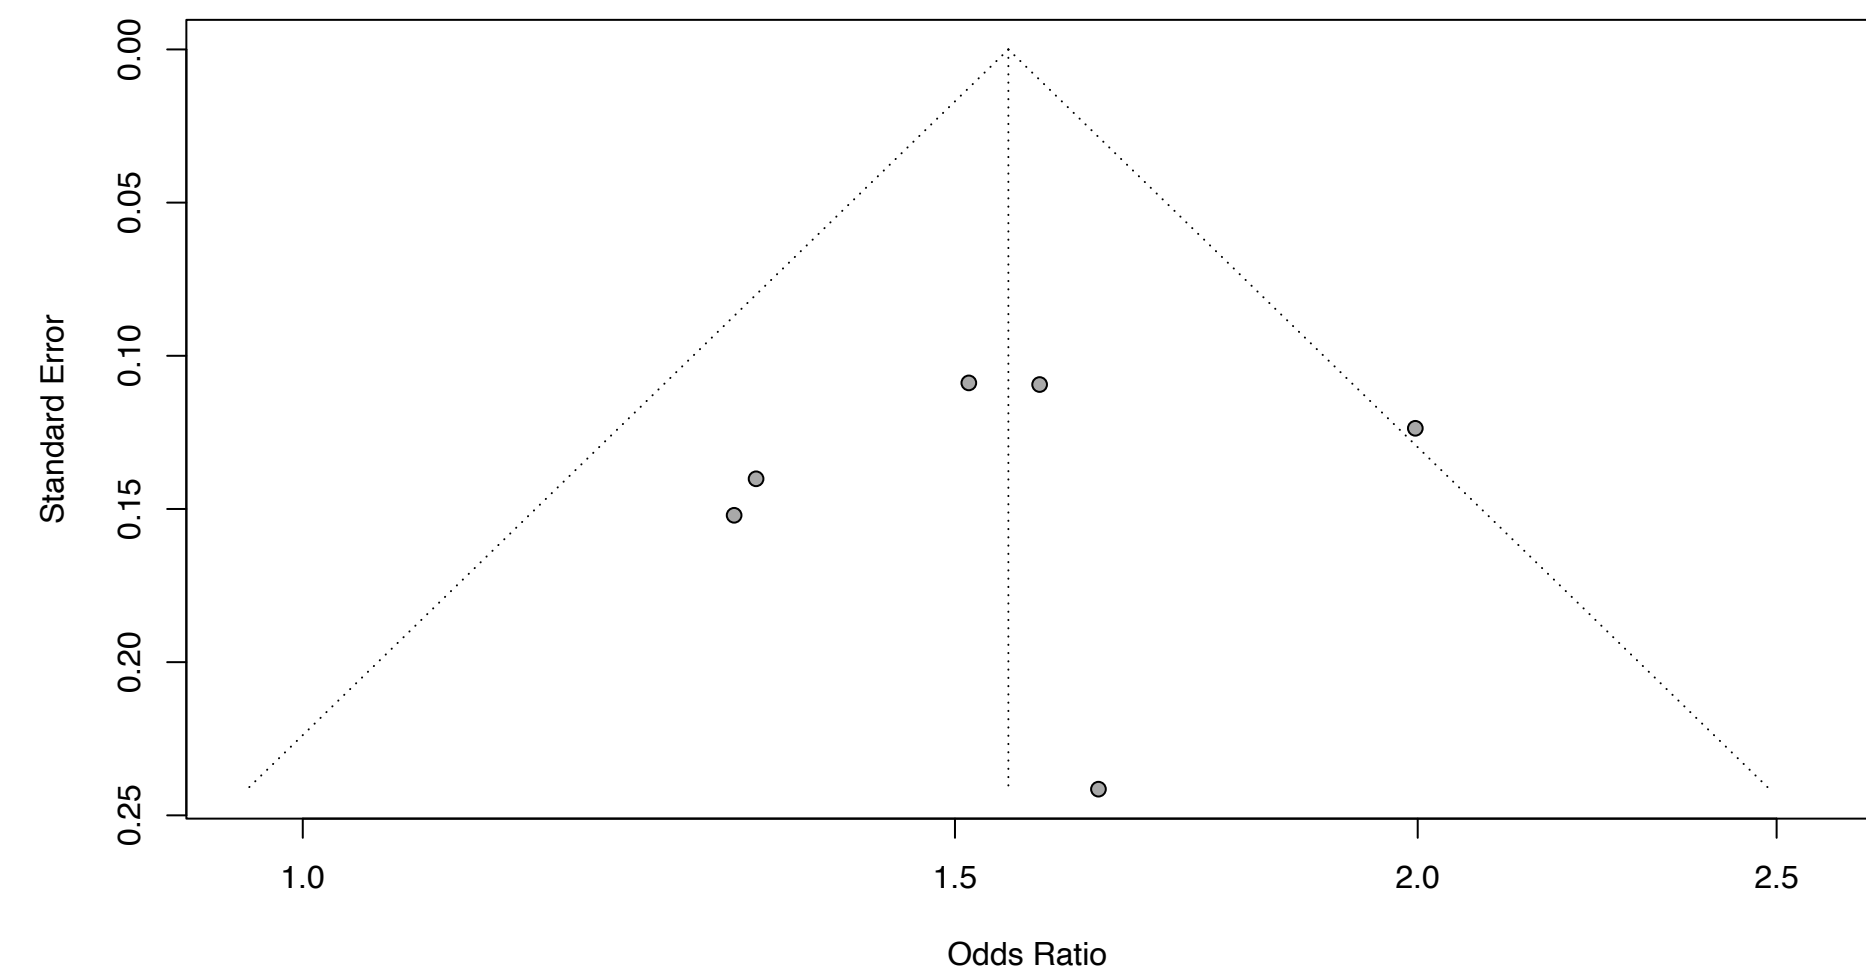

(b) depression

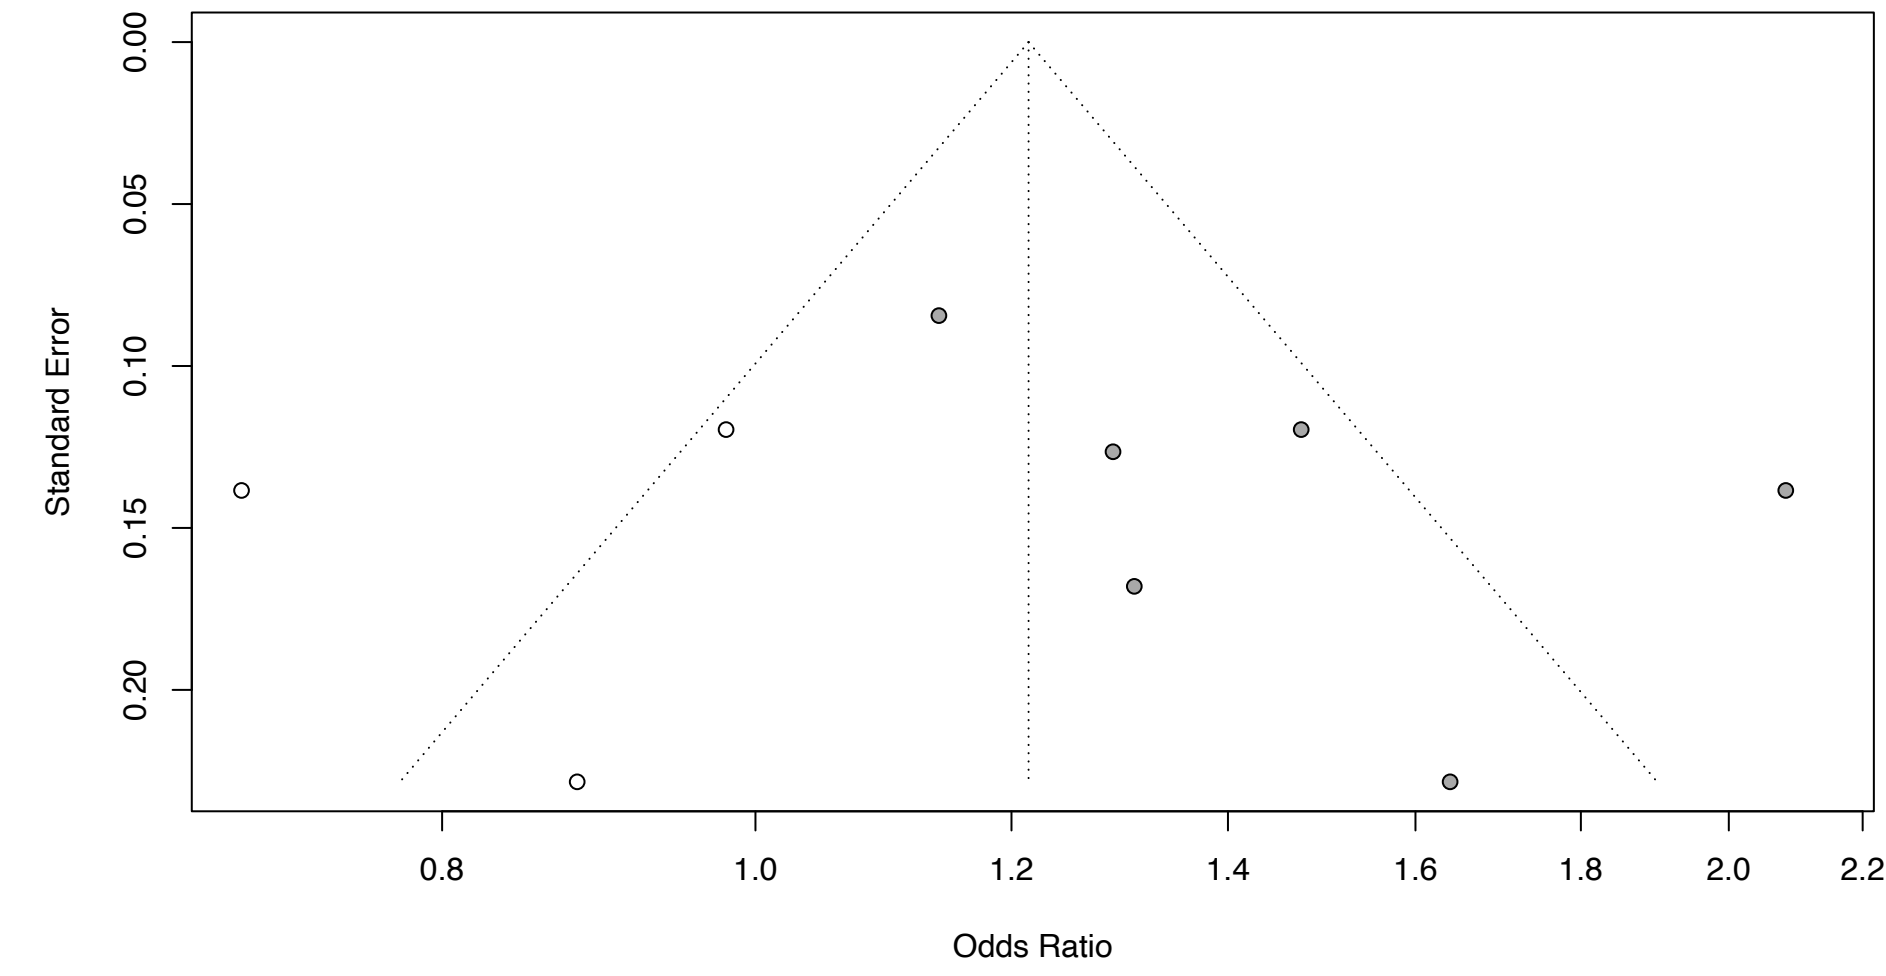

(c) stress

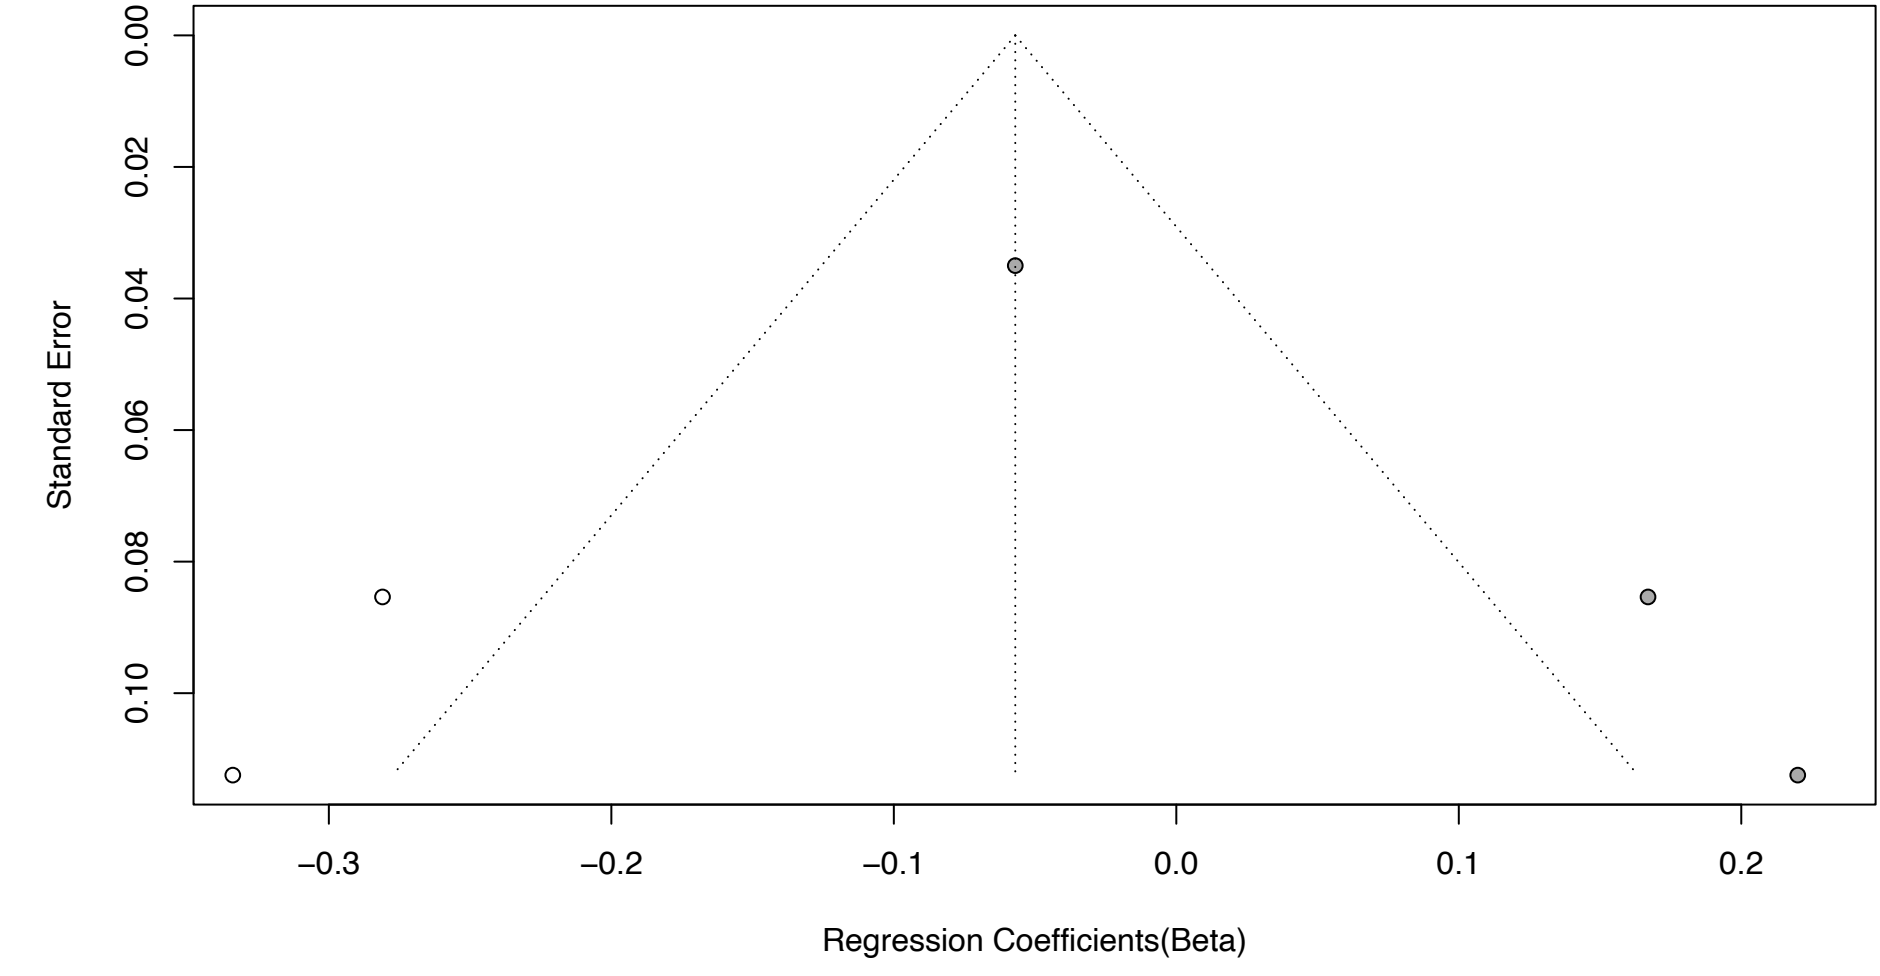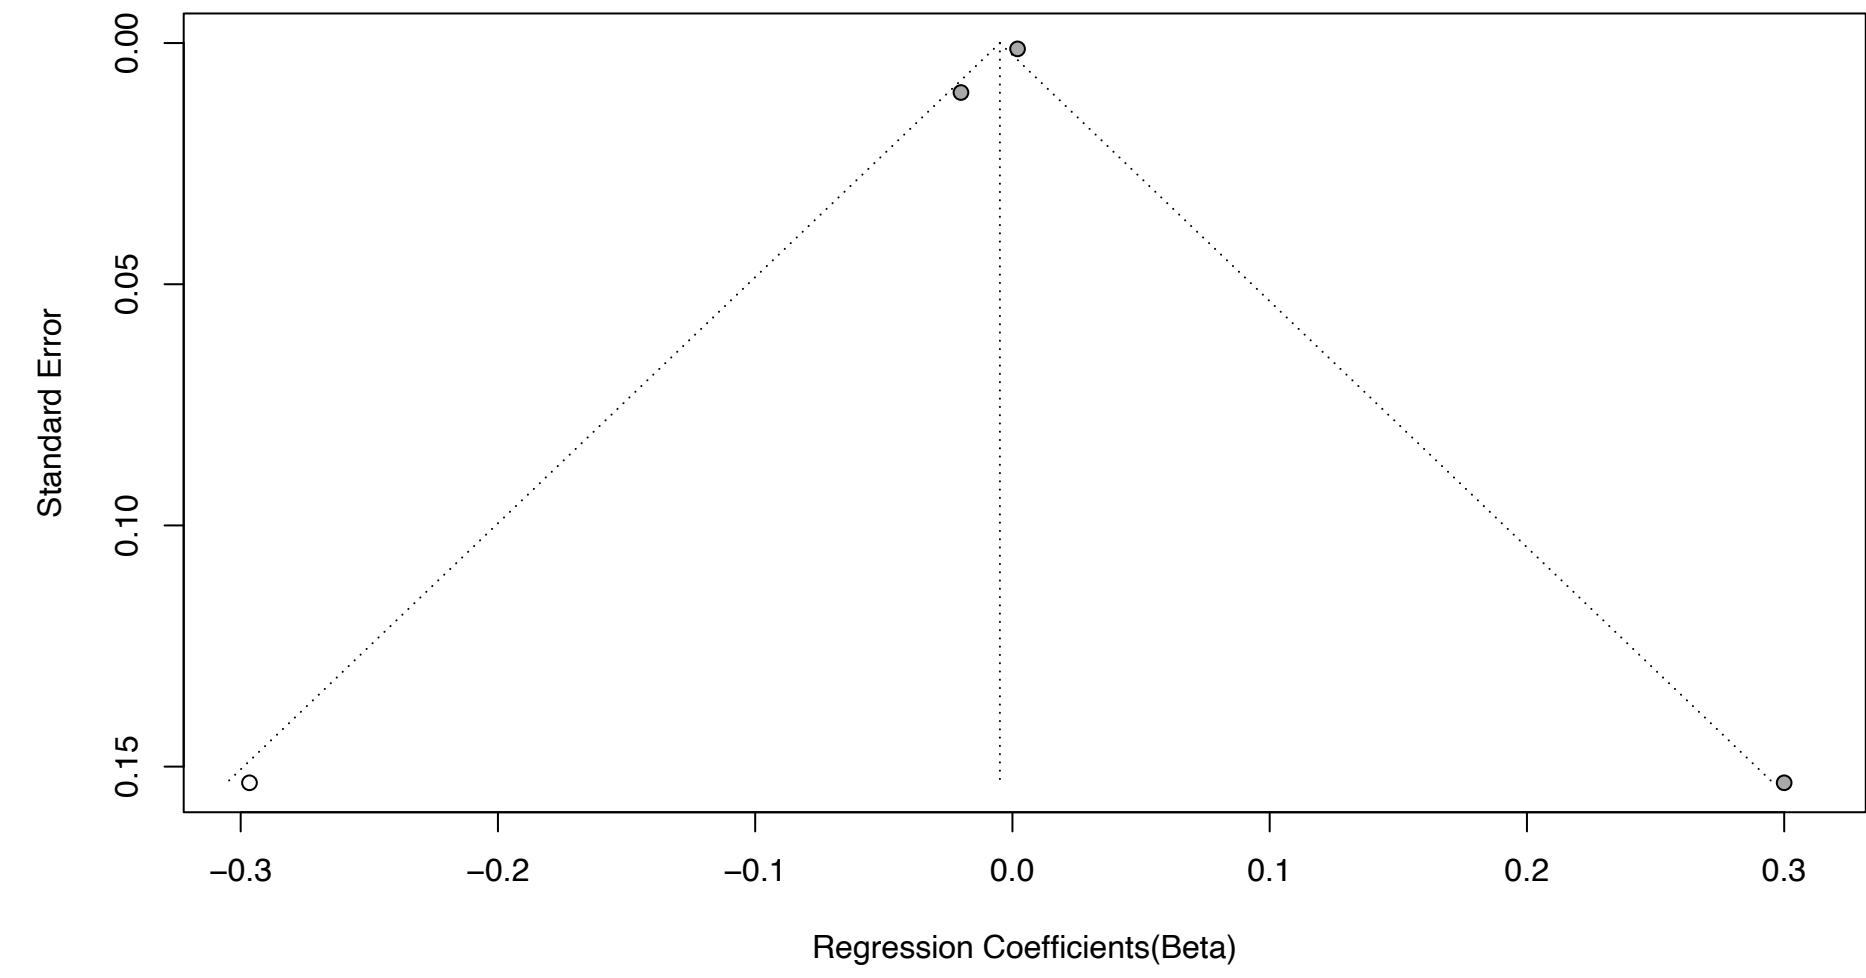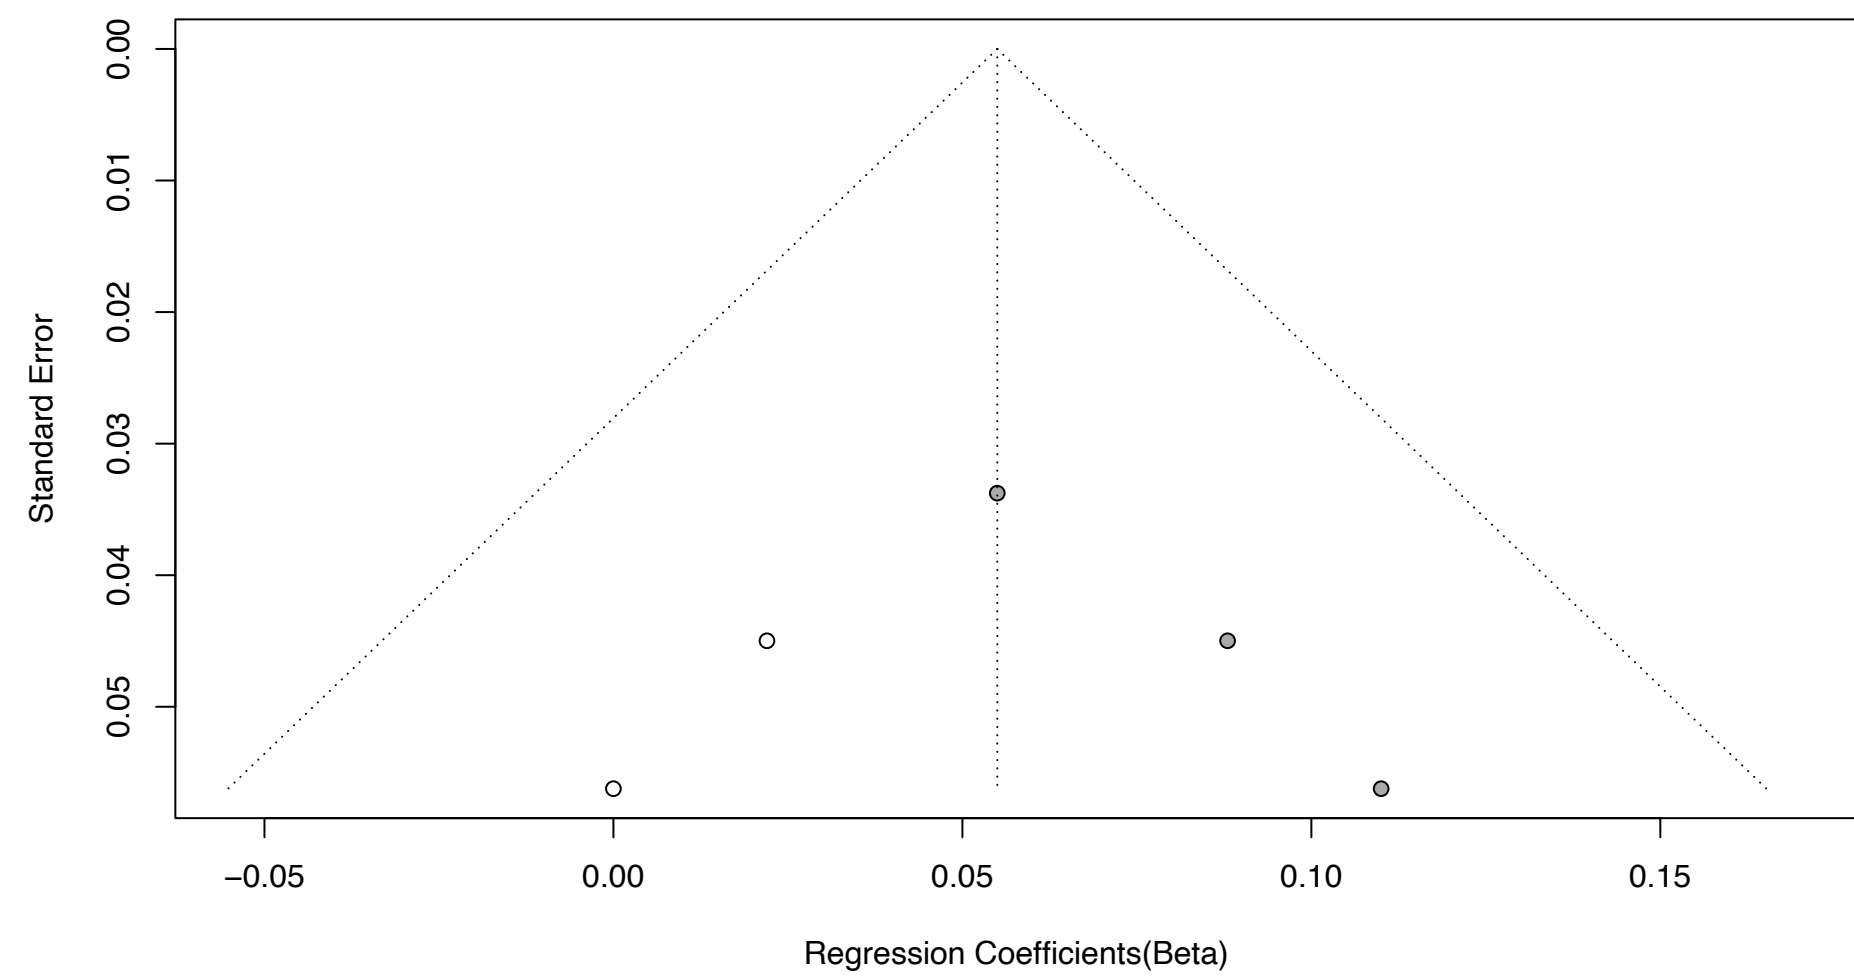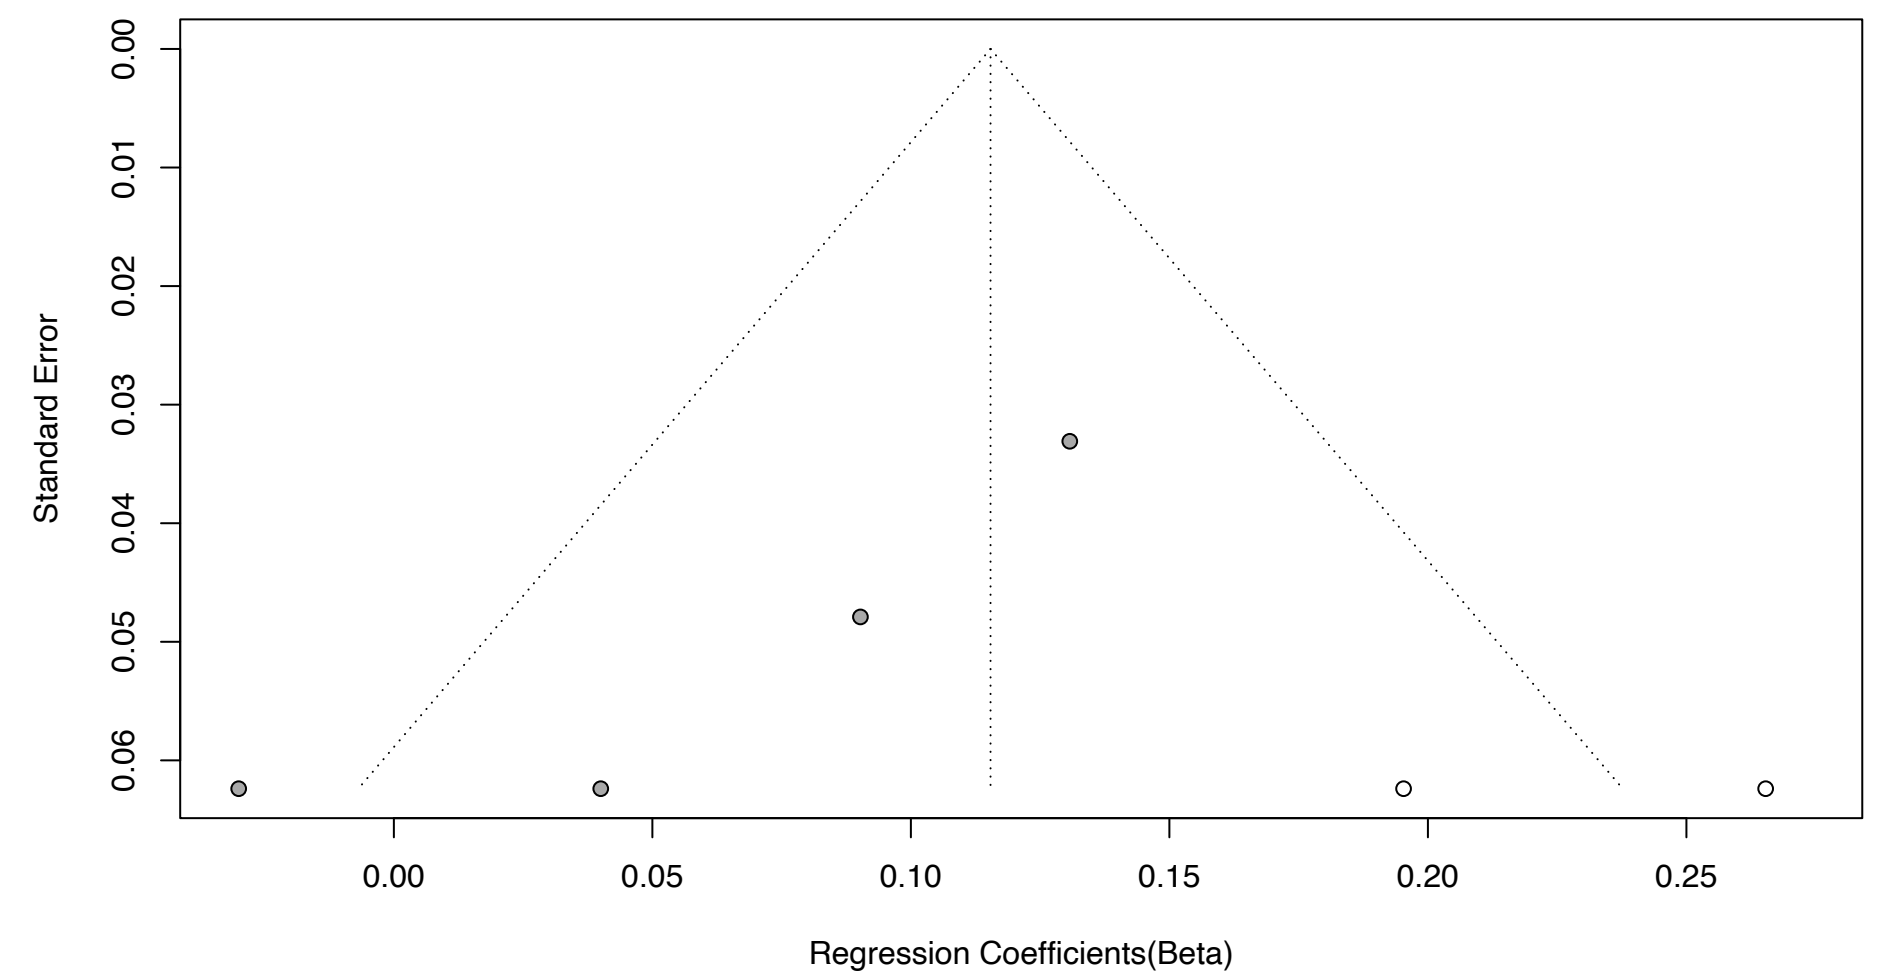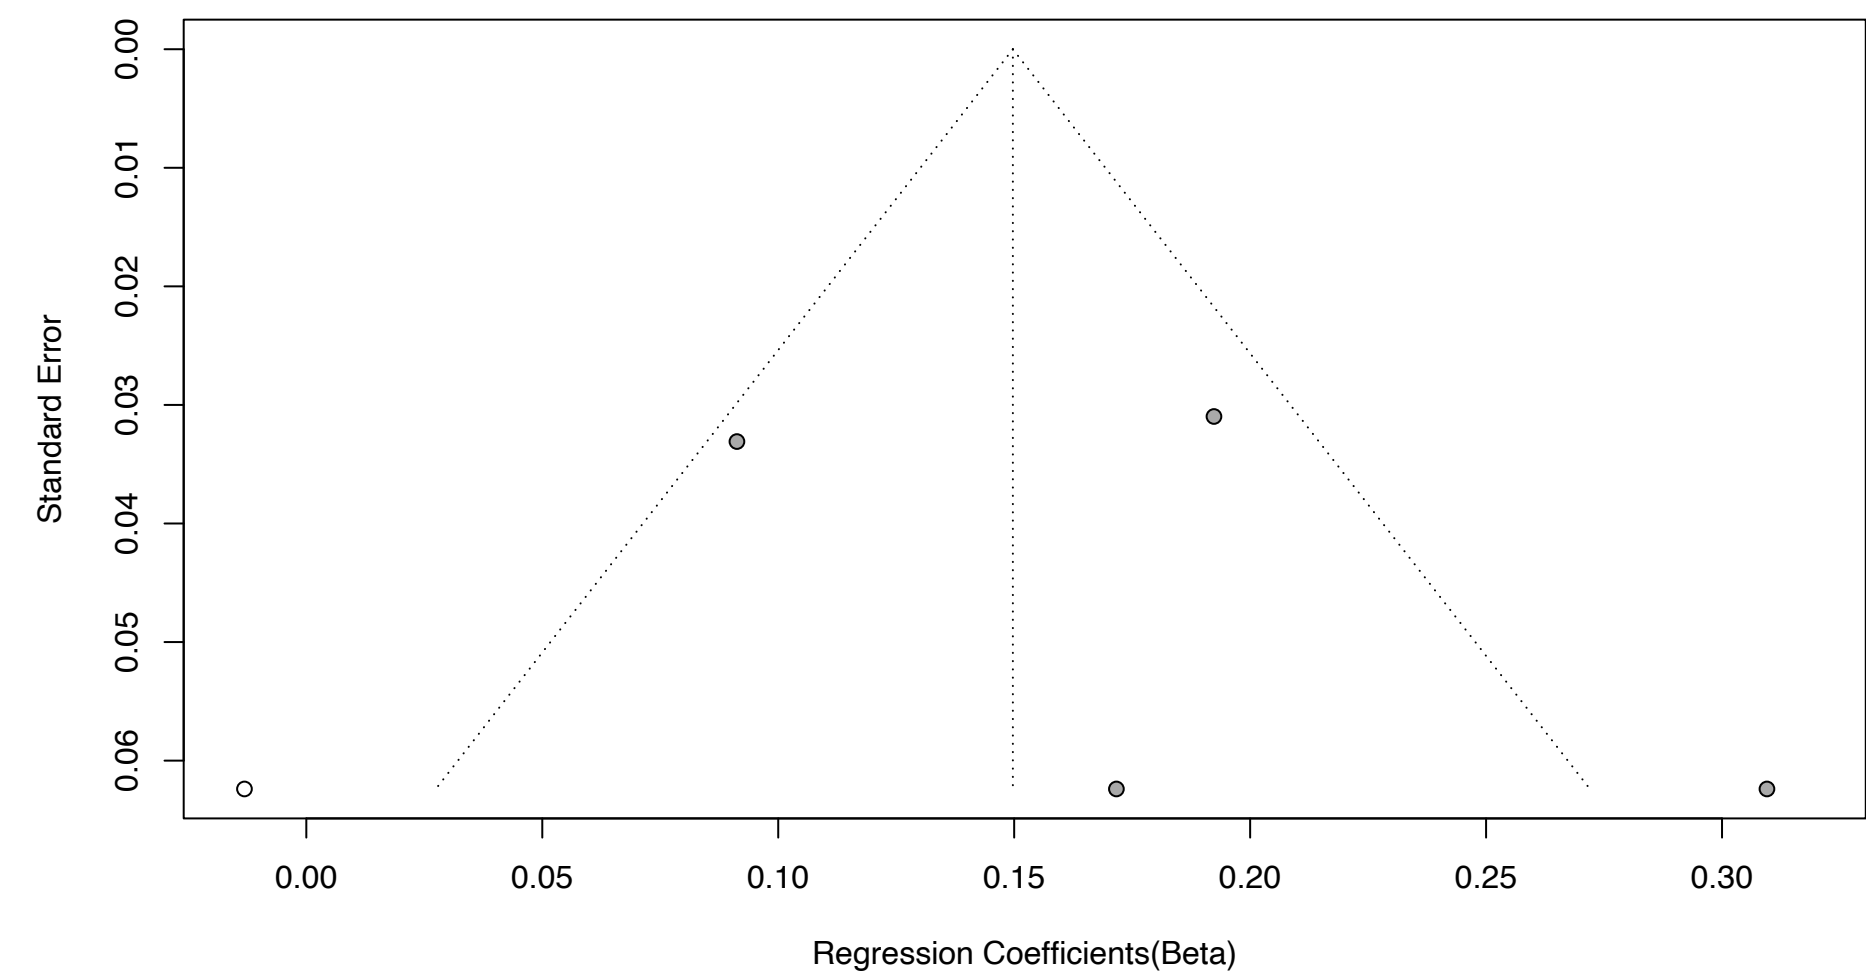

**Supplementary Material. 5** Funnel plots of trim-and-fill method adjusted for publication bias on relationship between social media exposure time and risk of various mental health symptoms in case-control studies. Each column represents funnel plots of (a) anxiety, (b) depression, and (c) stress.

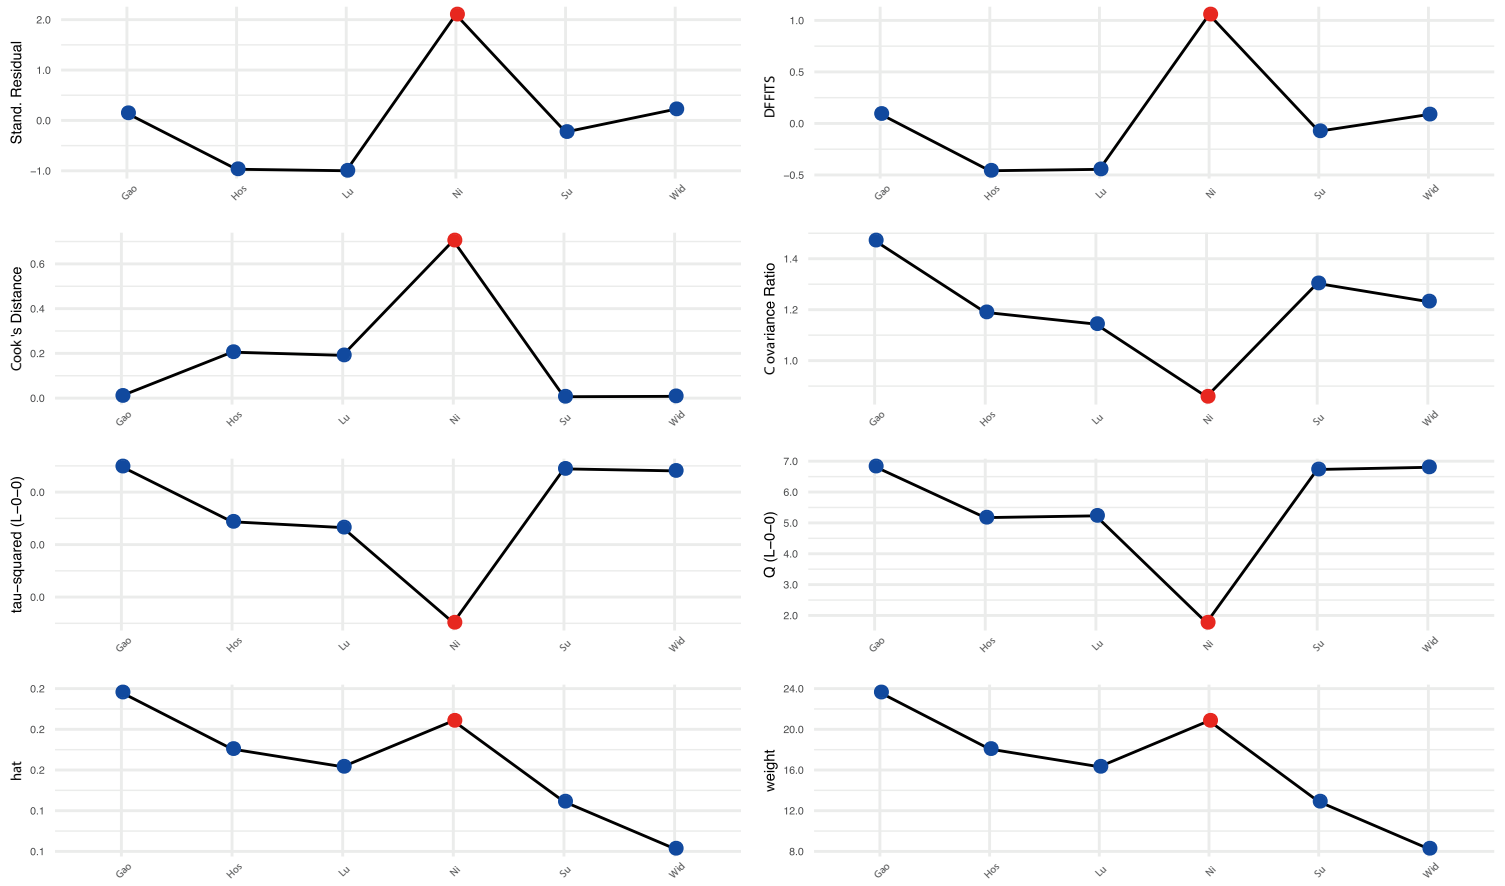

< Supplementary material 6-1 : influential analysis, Odds ratio, Anxiety >

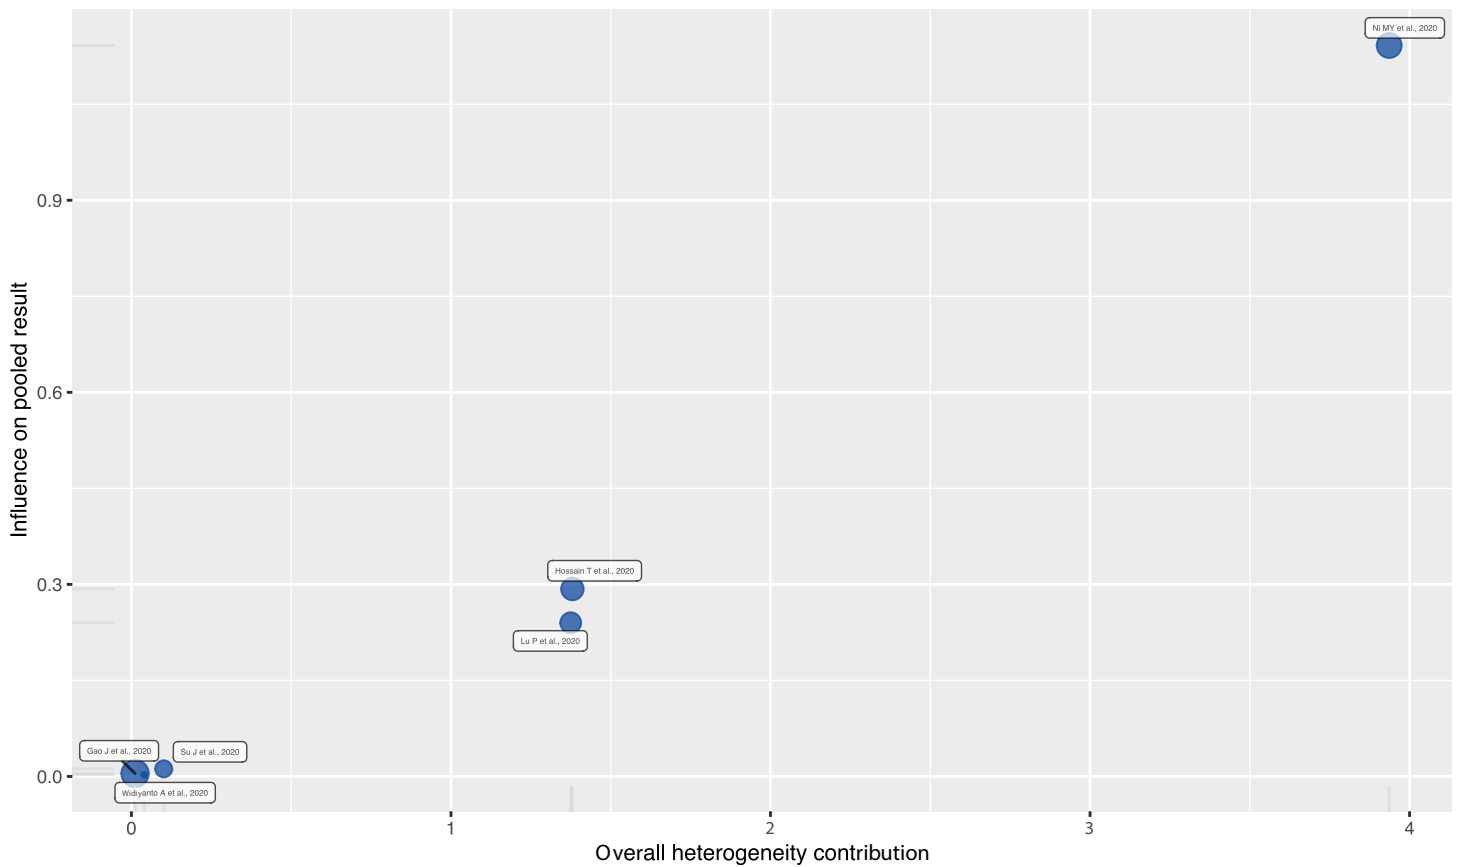

< Supplementary material 6-2 : Baujat plot, Odds ratio, Anxiety >

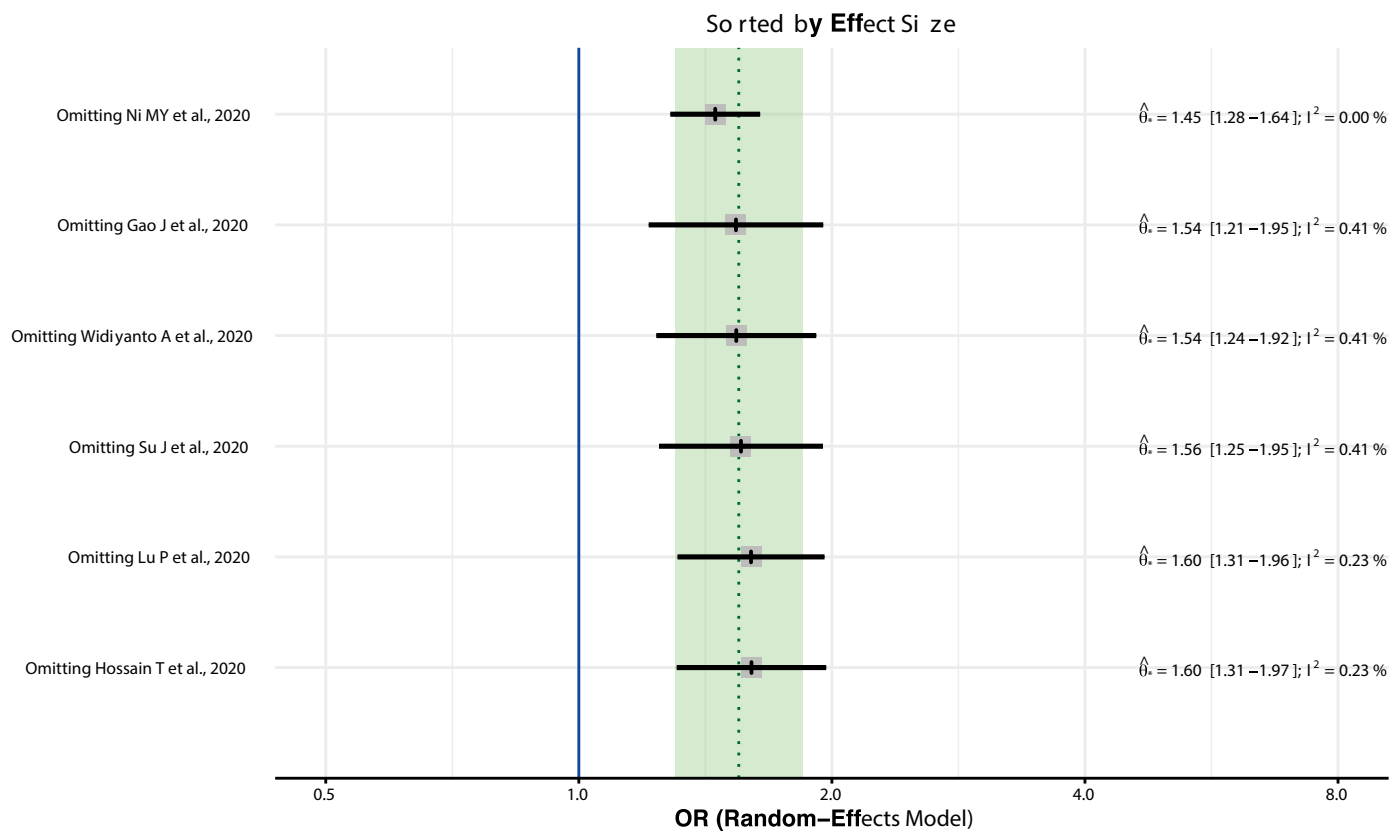

< Supplementary material 6-3 : Influential analysis: sorted by effect size, Odds ratio, Anxiety >

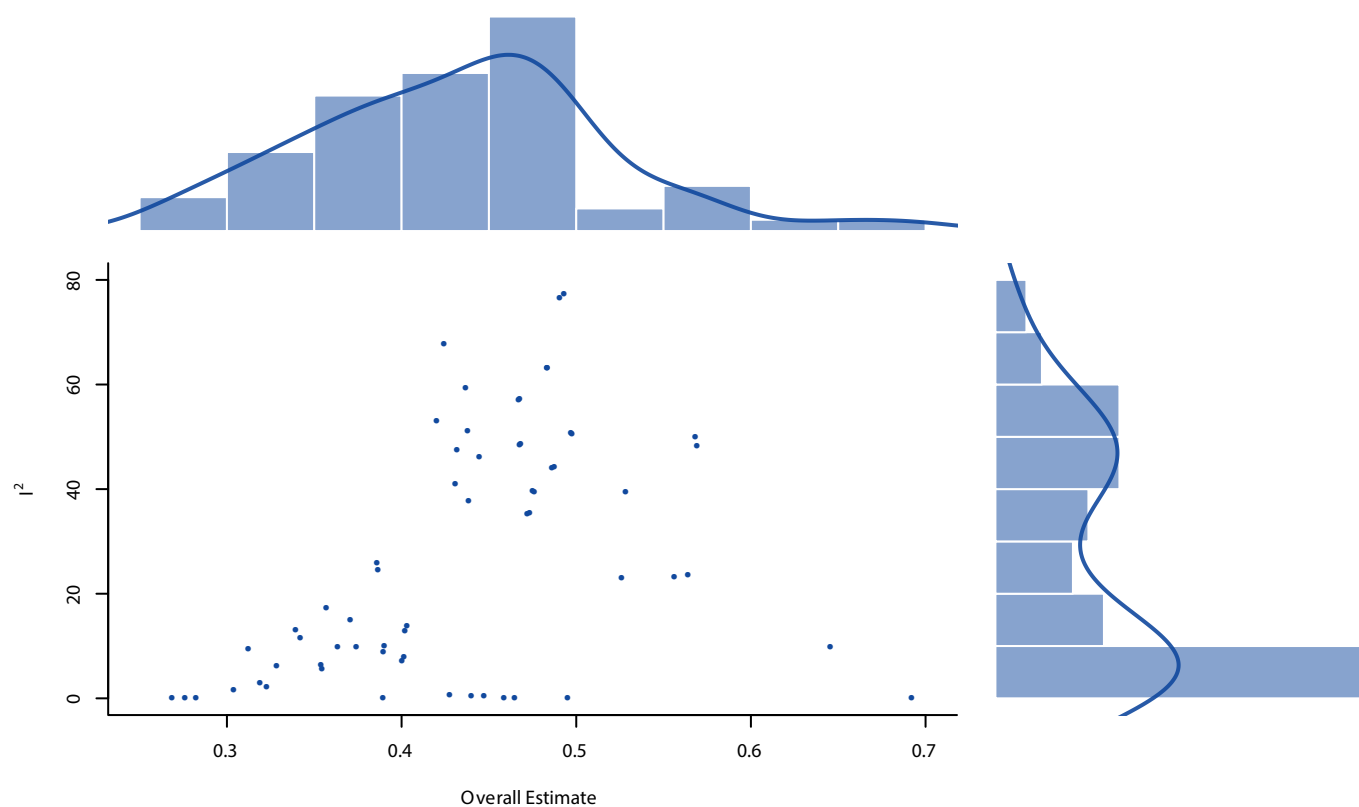

< Supplementary material 6-4 : GOSH plot, Odds ratio, Anxiety >

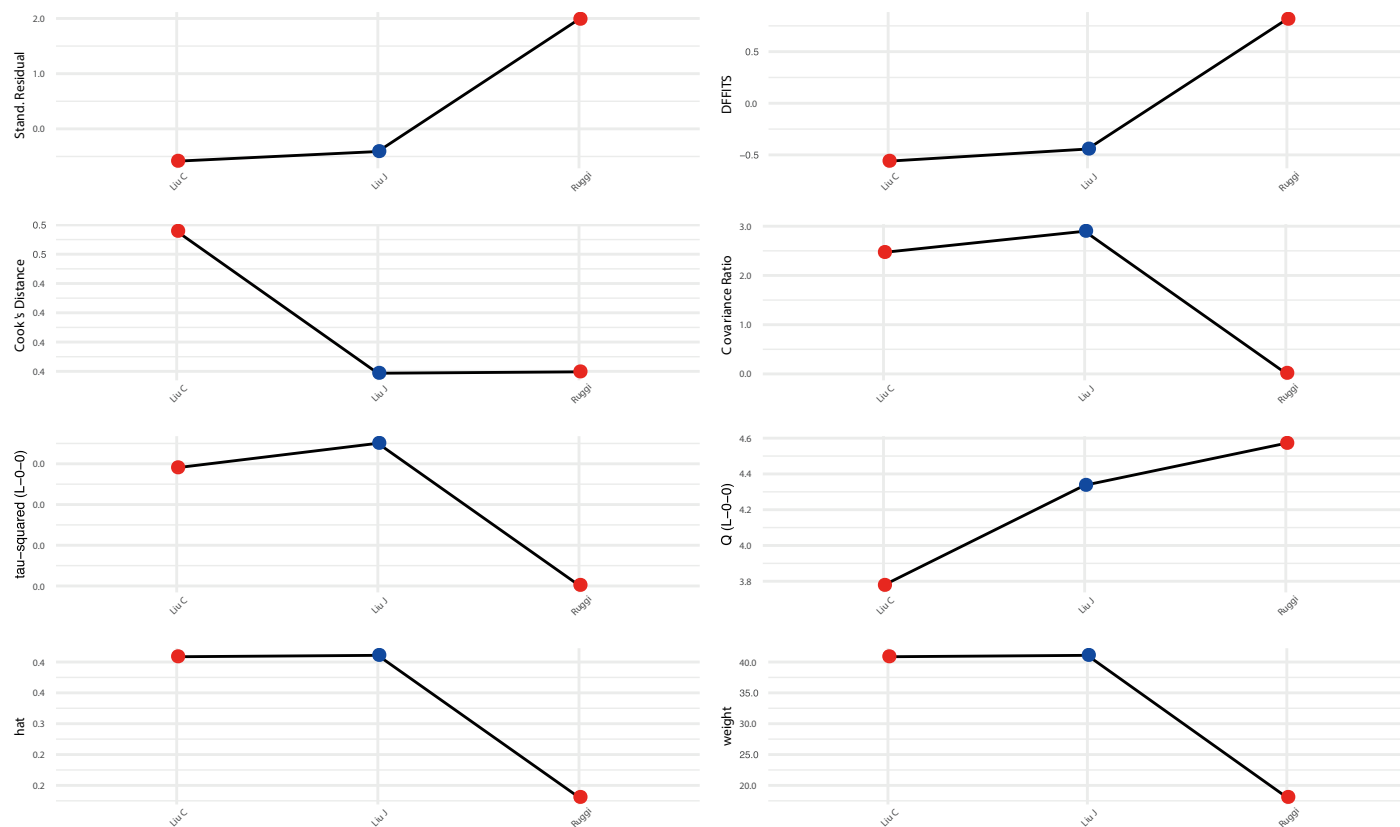

< Supplementary material 6-5: influential analysis, Beta, Anxiety>

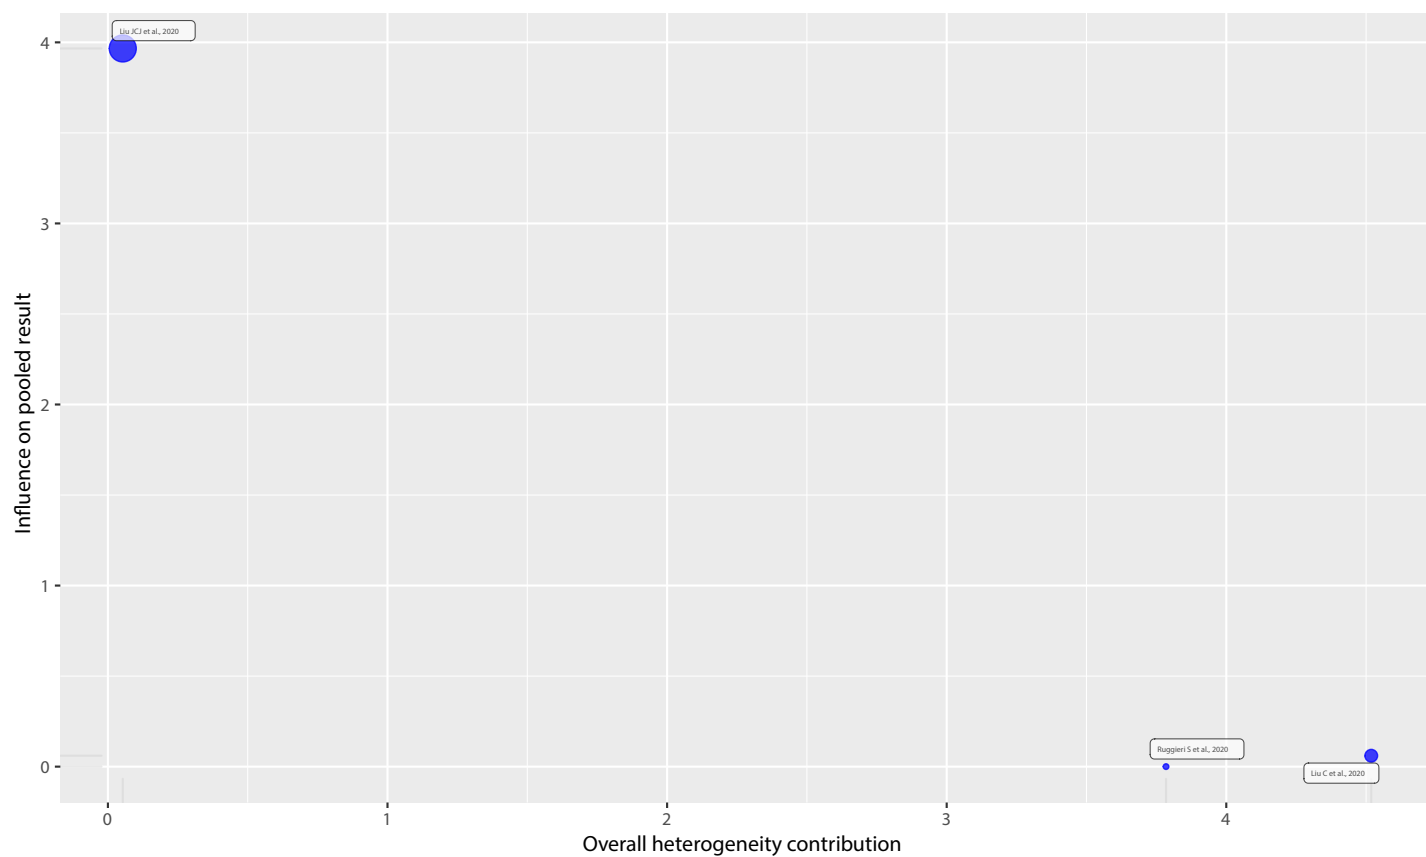

< Supplementary material 6-6: Baujat plot, Beta, Anxiety >

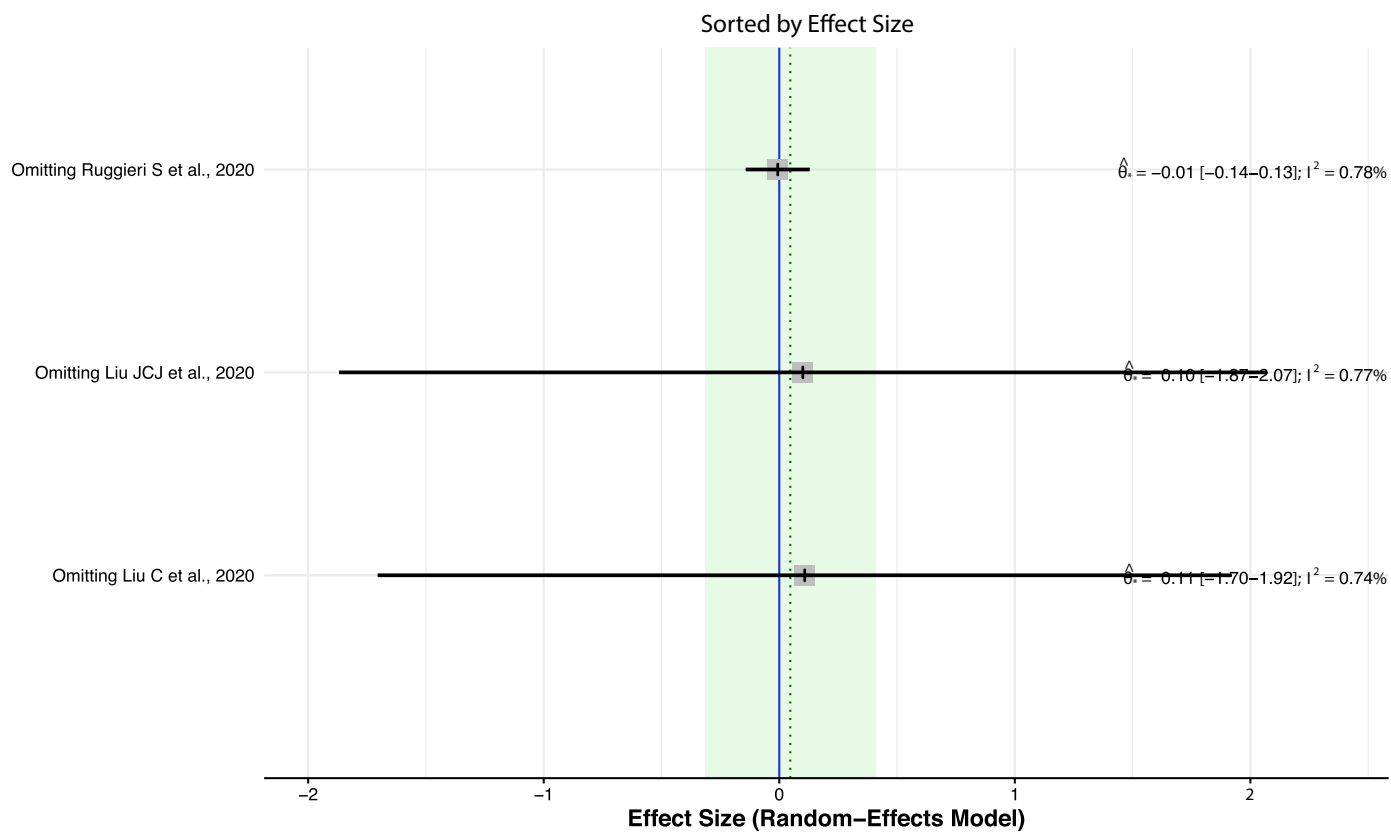

< Supplementary material 6-7 : Influential analysis: sorted by effect size, Beta, Anxiety >

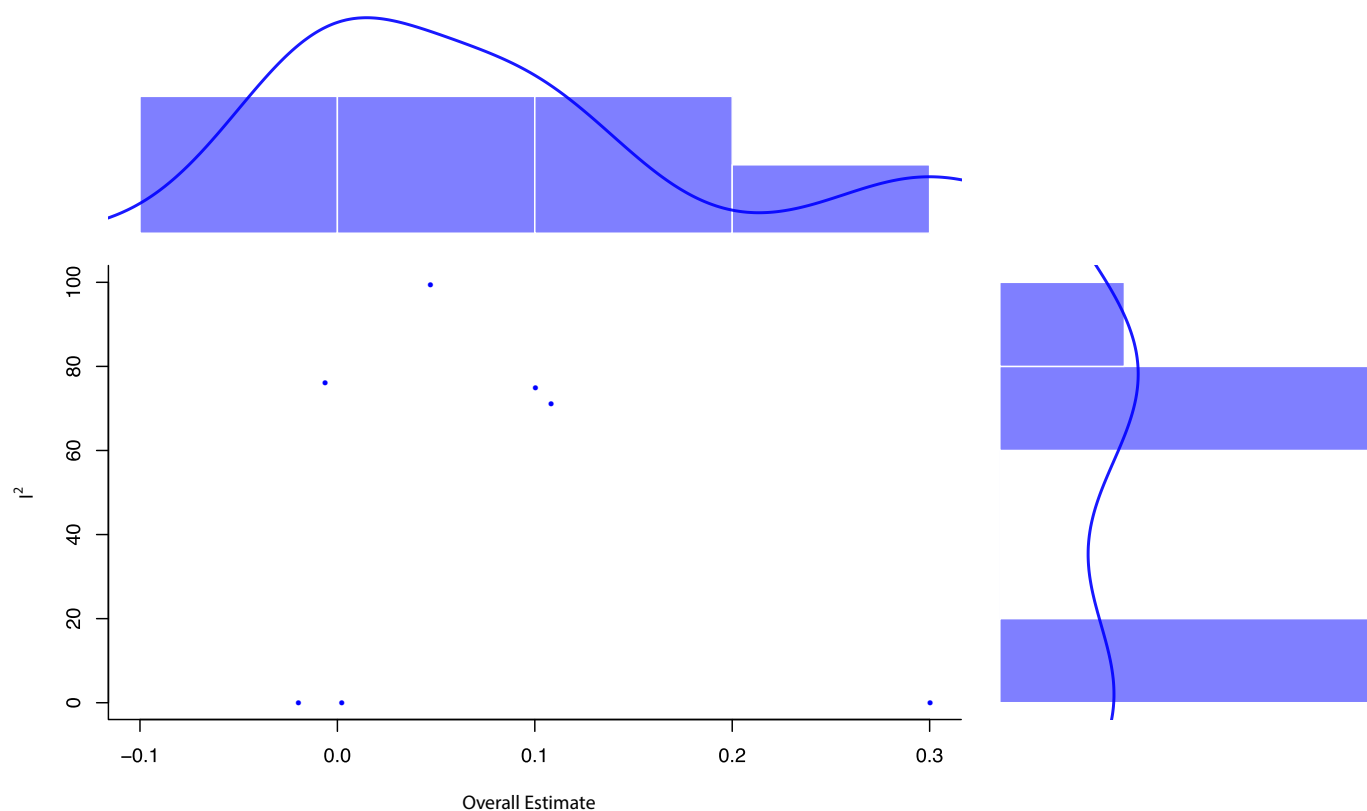

< Supplementary material 6-8: GOSH plot, Beta, Anxiety >

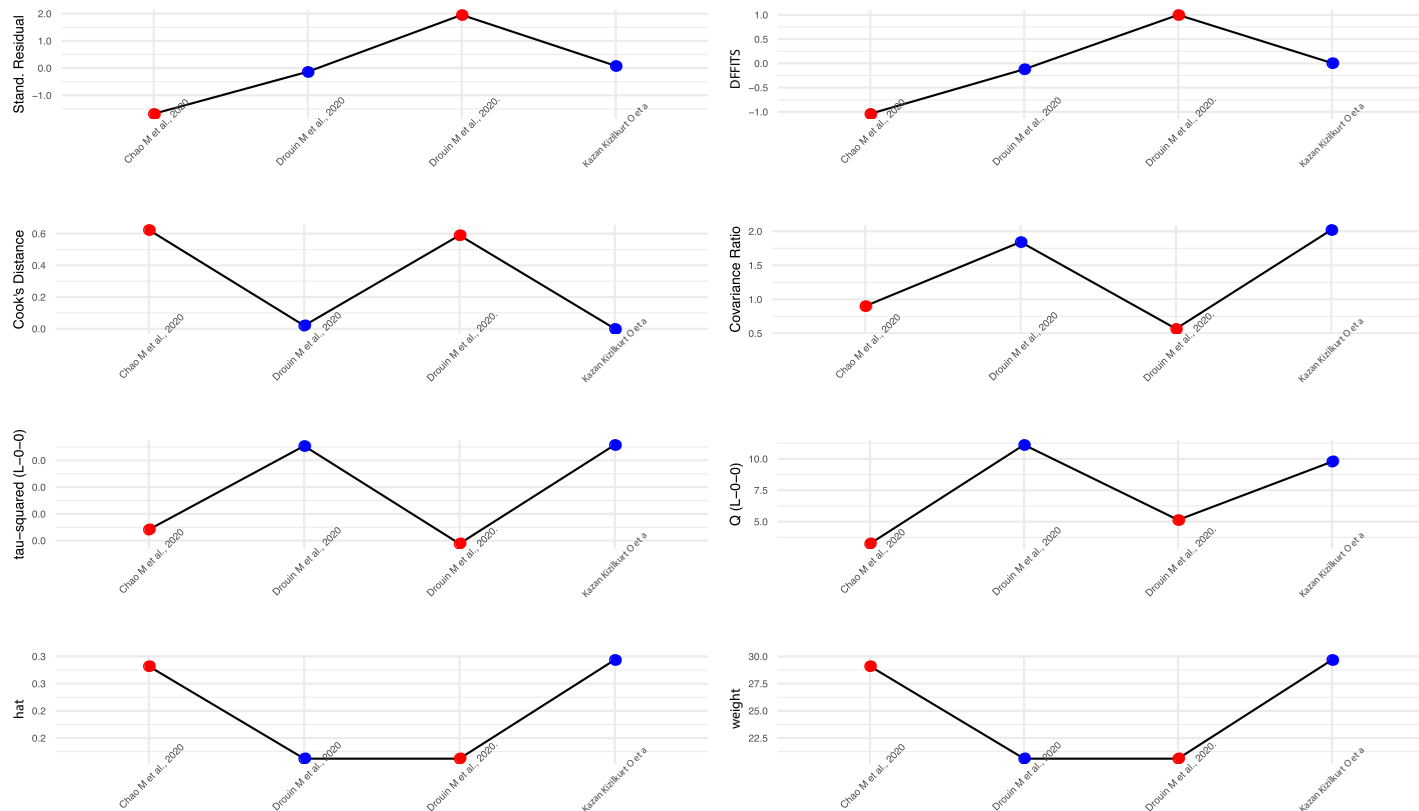

< Supplementary material 6-9 : influential analysis, correlation, Anxiety >

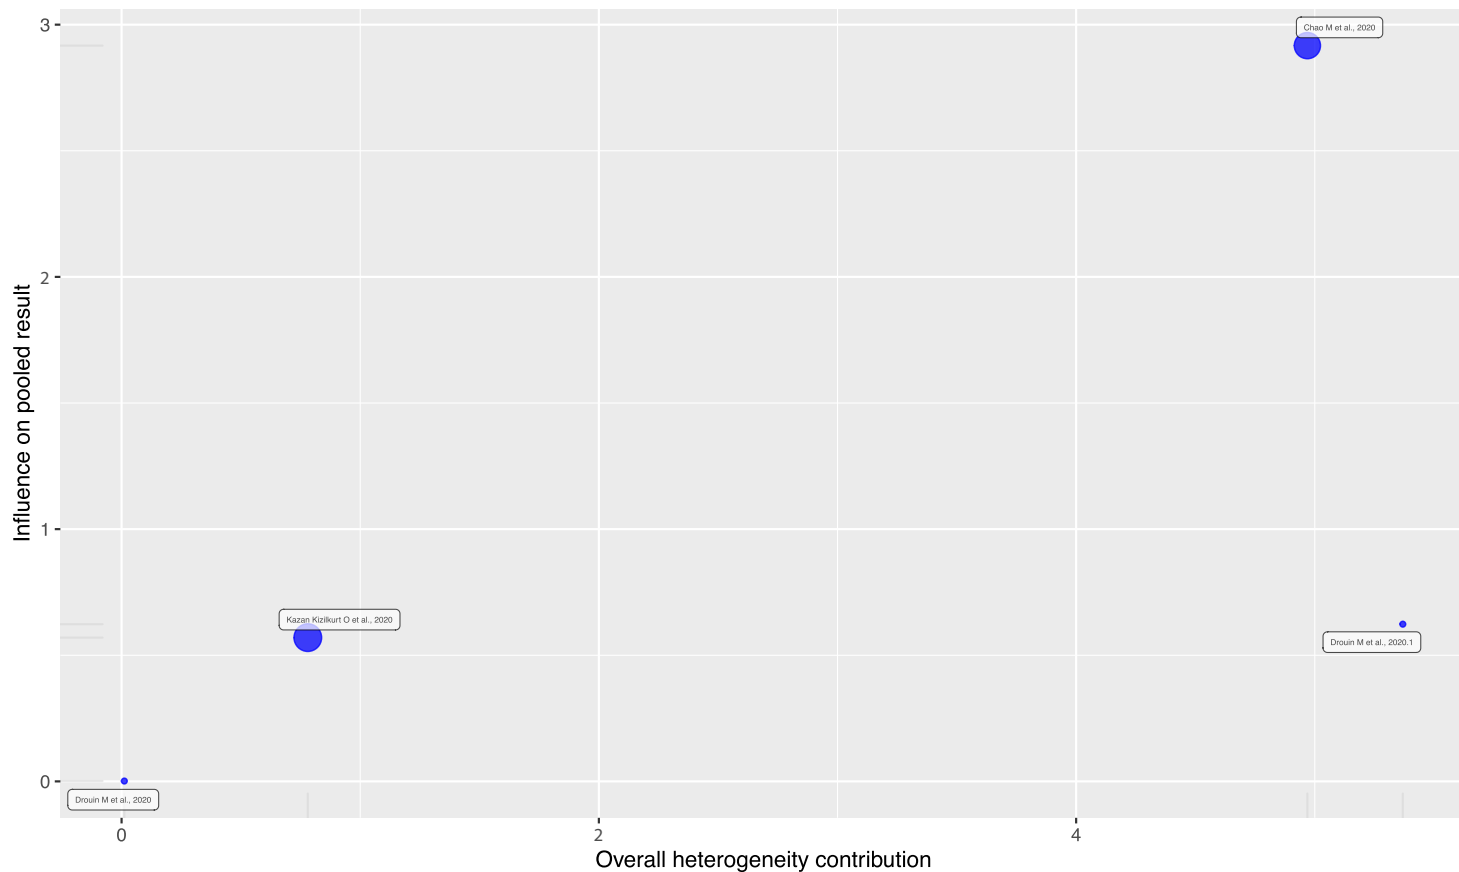

< Supplementary material 6-10: Baujat plot, correlation, Anxiety >

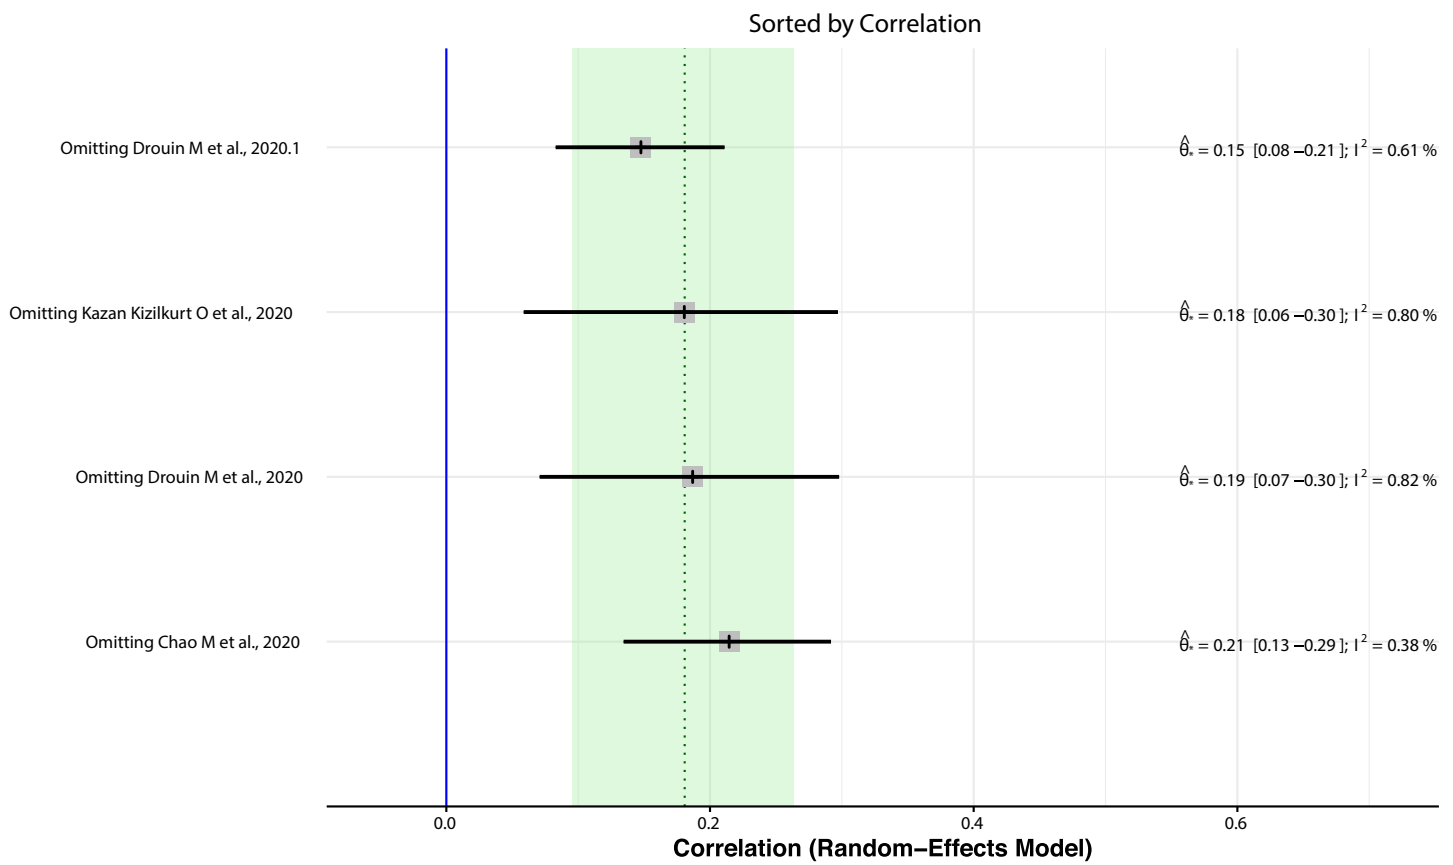

< Supplementary material 6-11: Influential analysis: sorted by effect size, correlation, Anxiety >

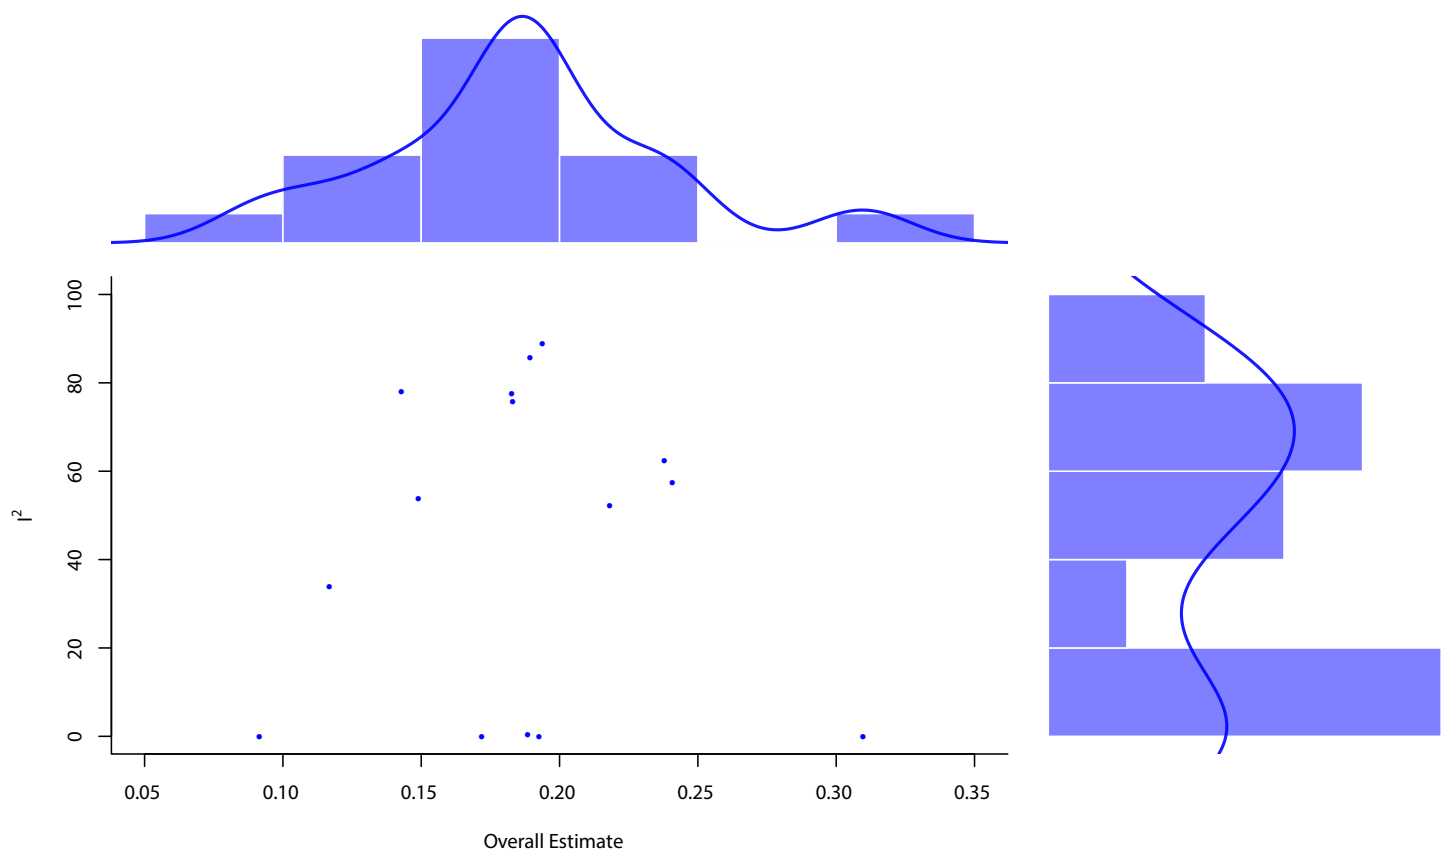

< Supplementary material 6-12: GOSH plot, correlation, Anxiety >

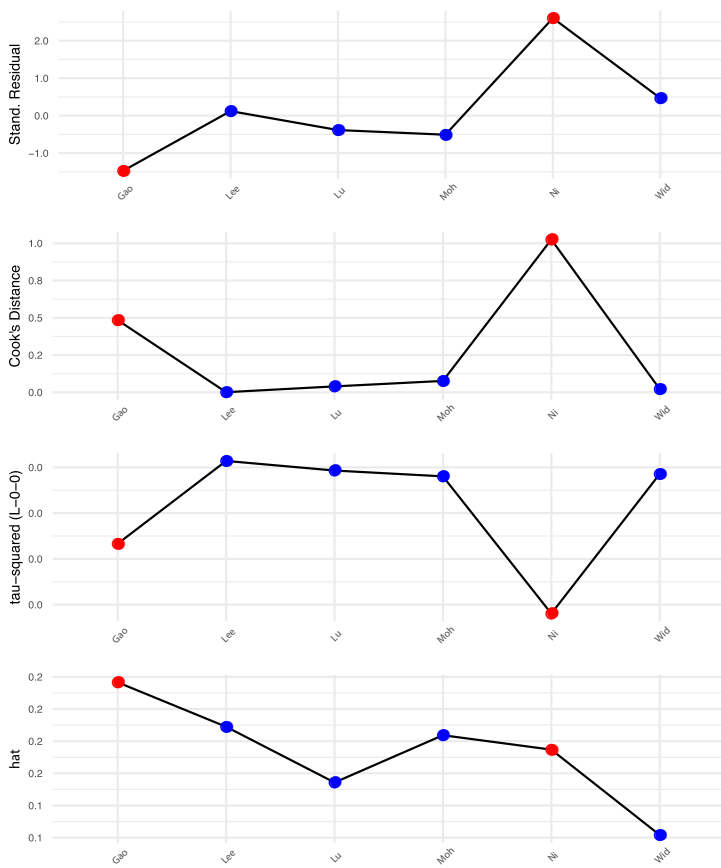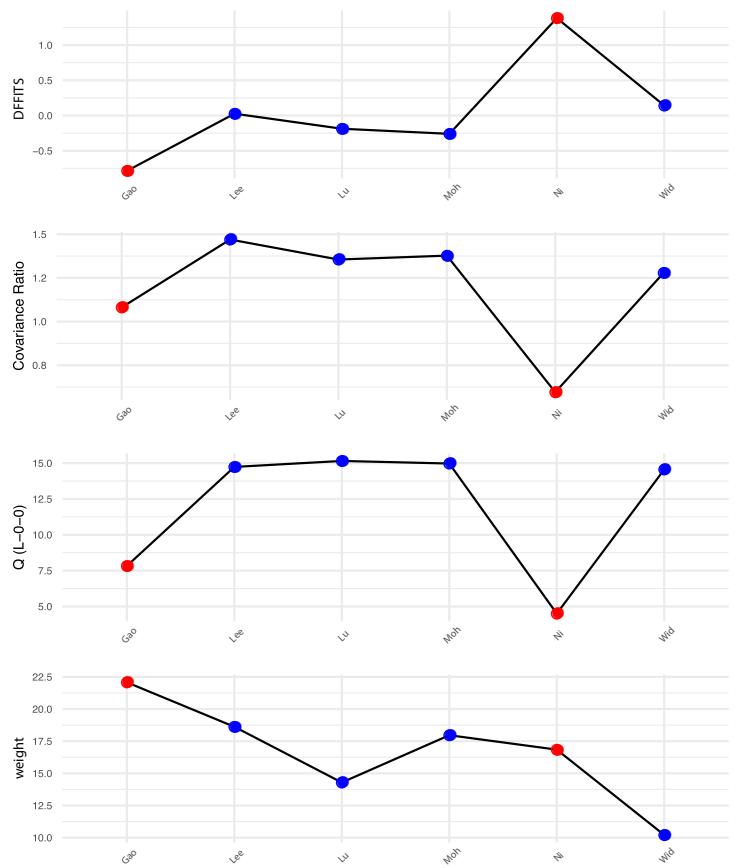

< Supplementary material 6-13: influential analysis, odds ratio, Depression >

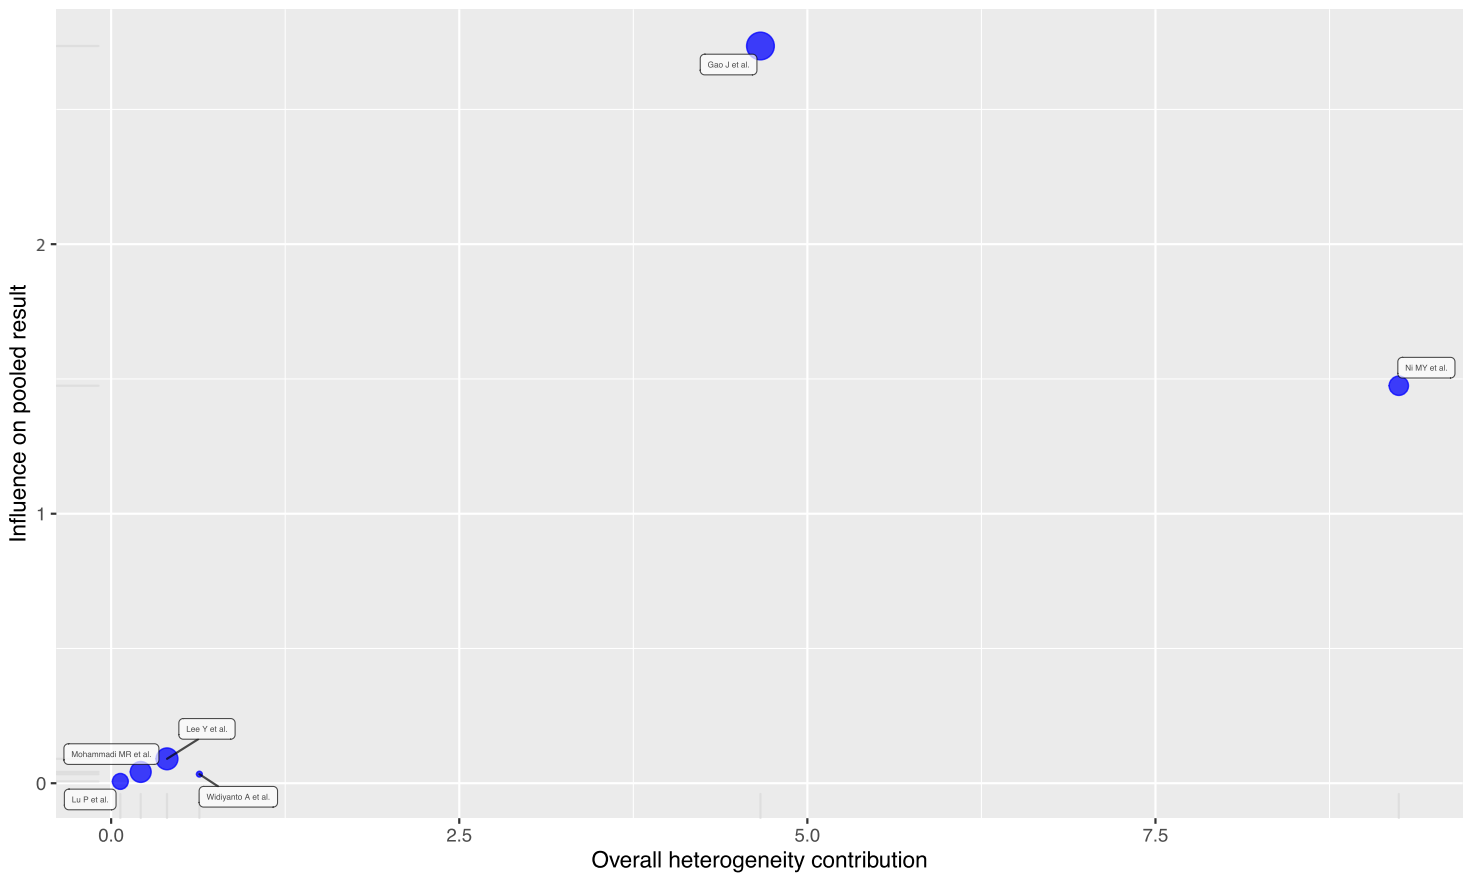

< Supplementary material 6-14: Baujat plot, odds ratio, Depression >

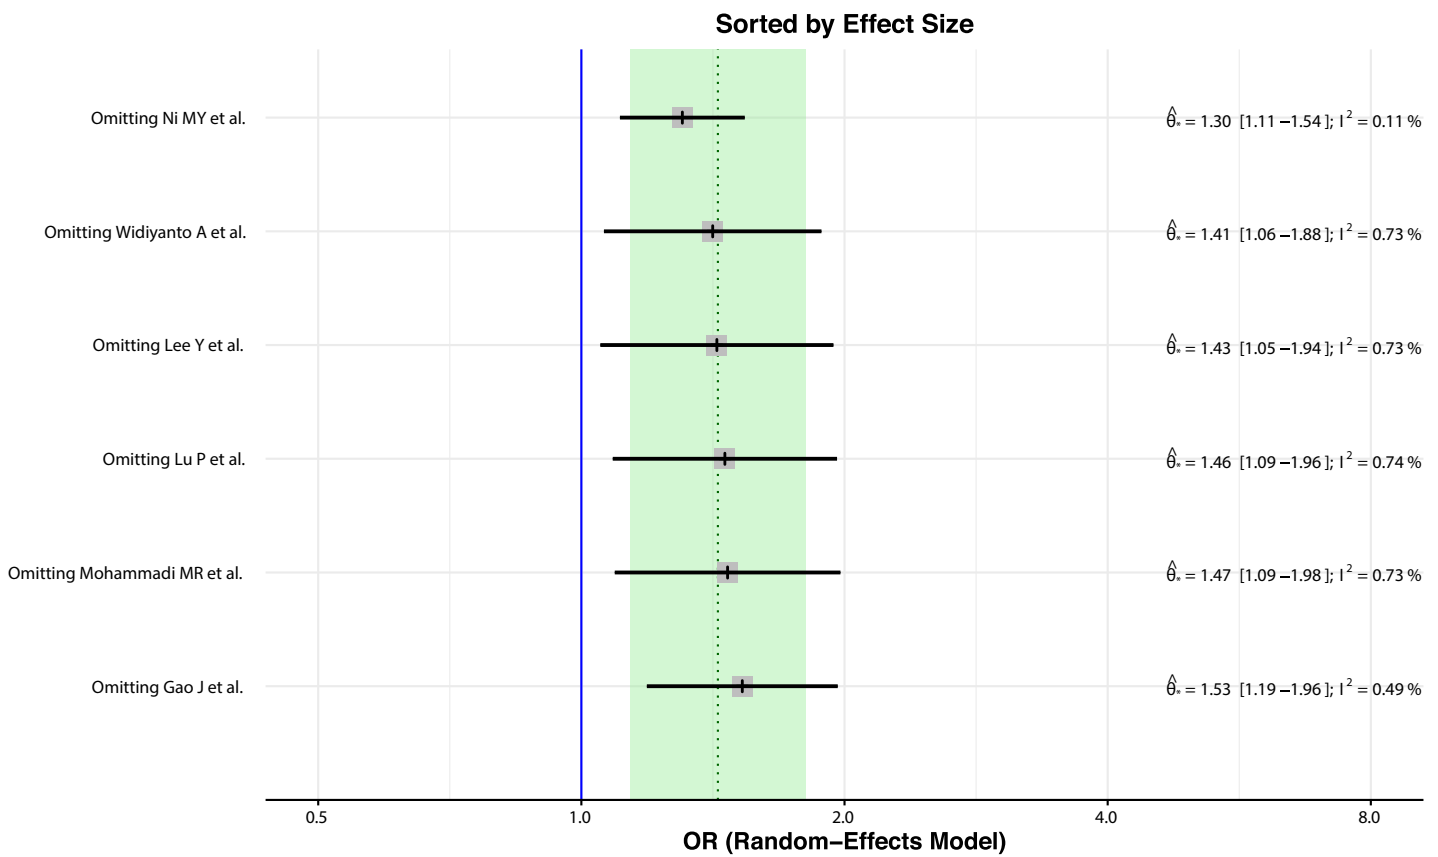

< Supplementary material 6-15: Influential analysis: sorted by effect size, odds ratio, Depression >

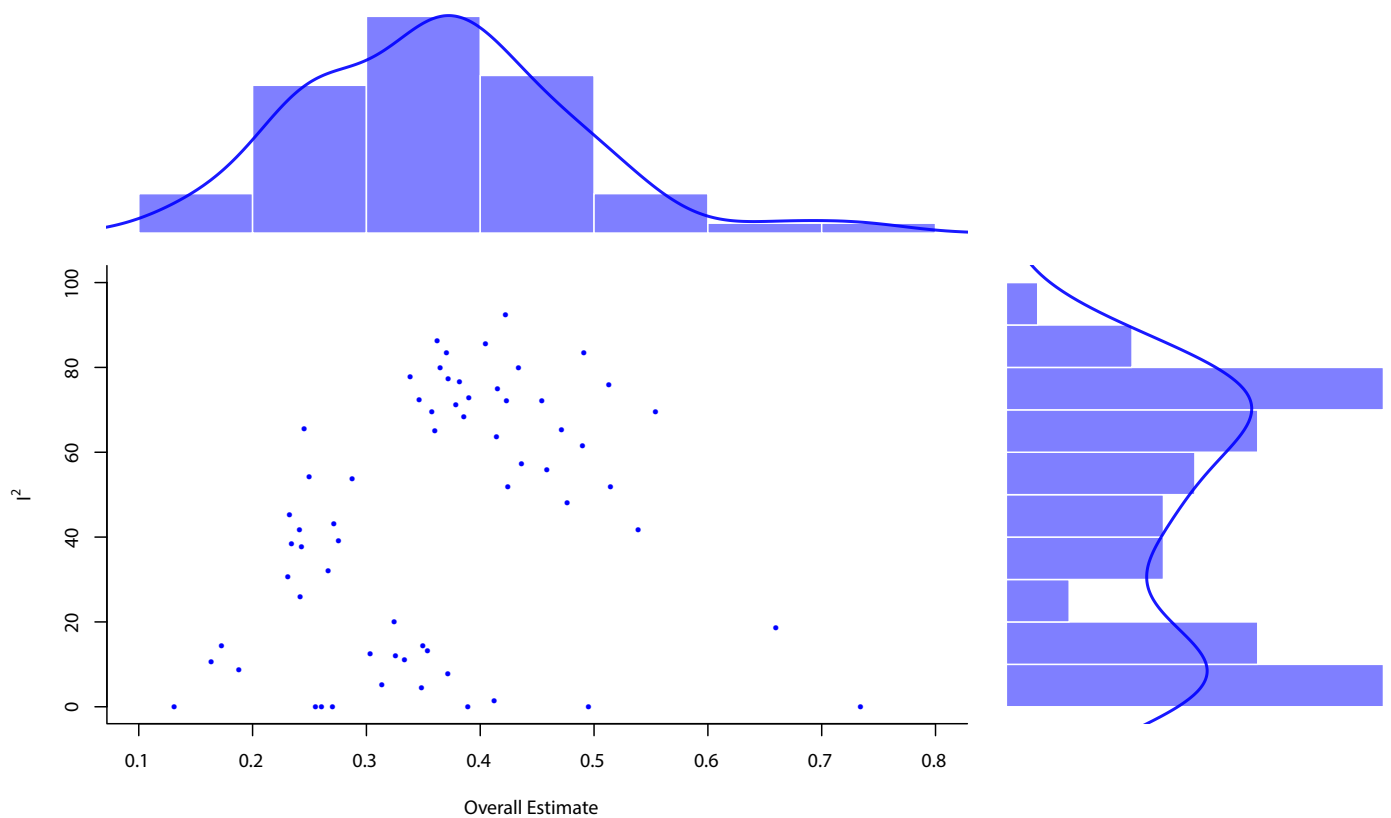

< Supplementary material 6-16: GOSH plot, Odds ratio, Depression >

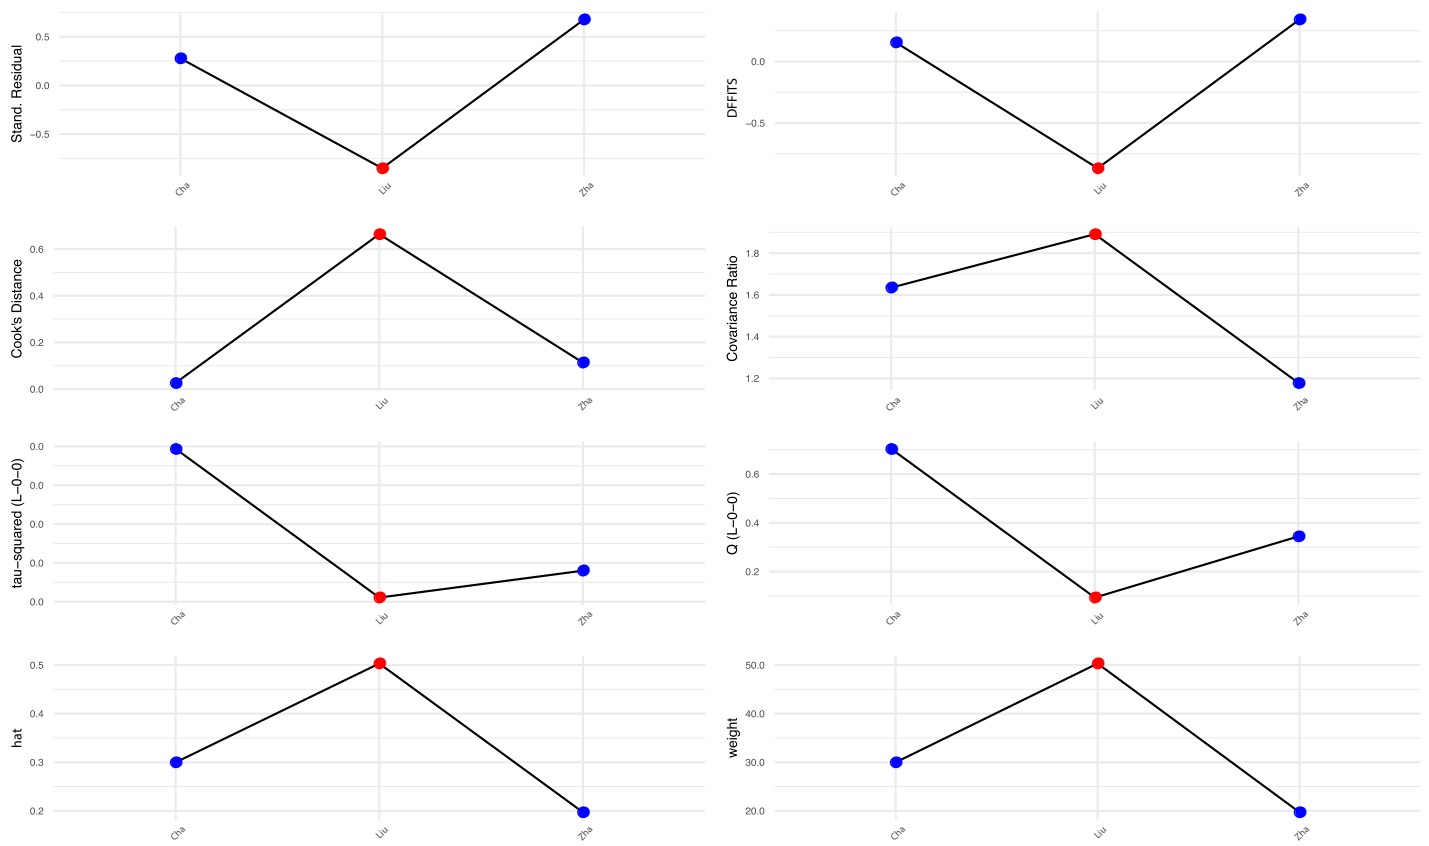

< Supplementary material 6-17: influential analysis, Beta, Depression >

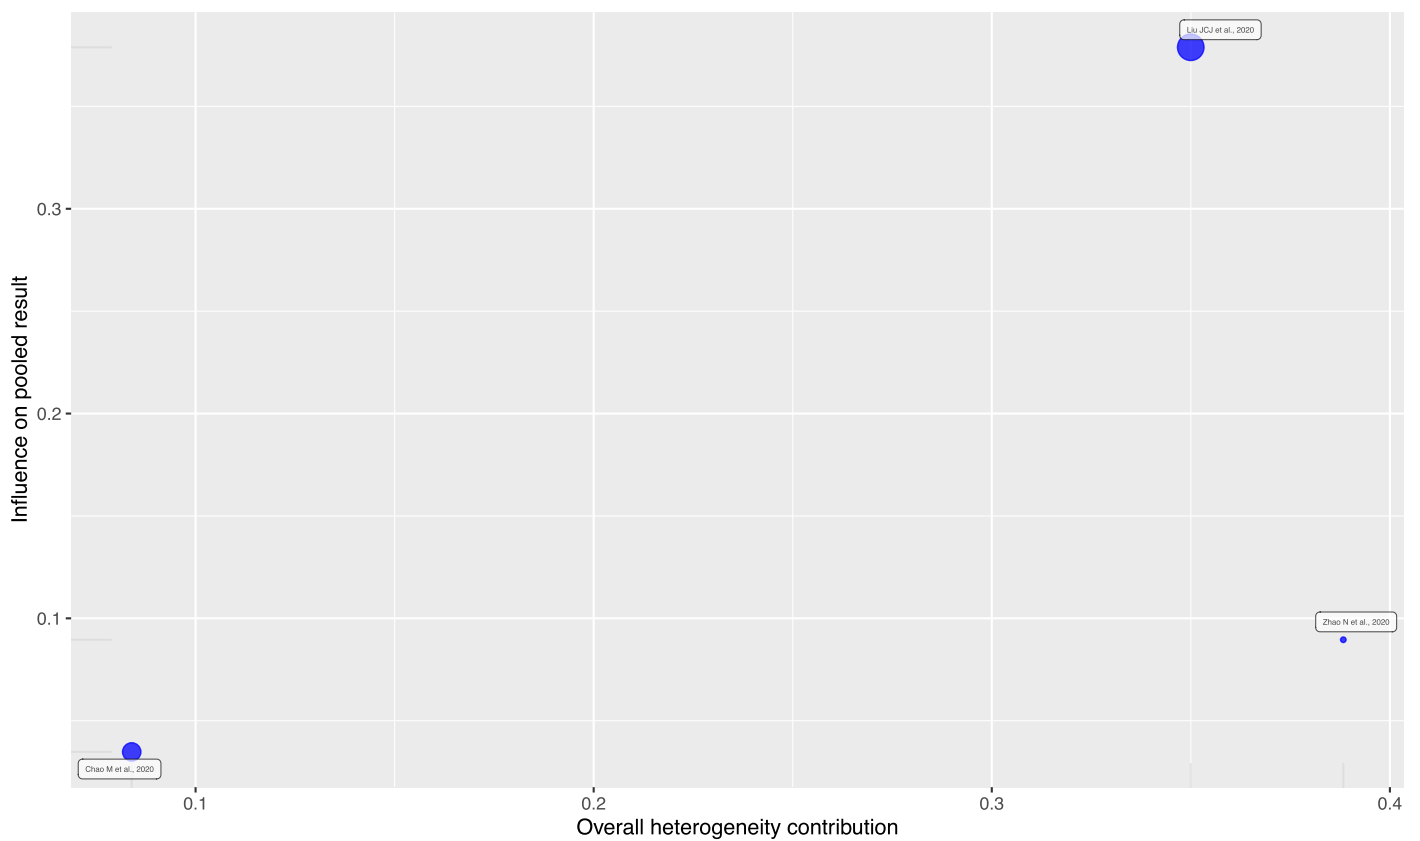

< Supplementary material 6-18: Baujat plot, Beta, Depression >

Sorted by Effect Size

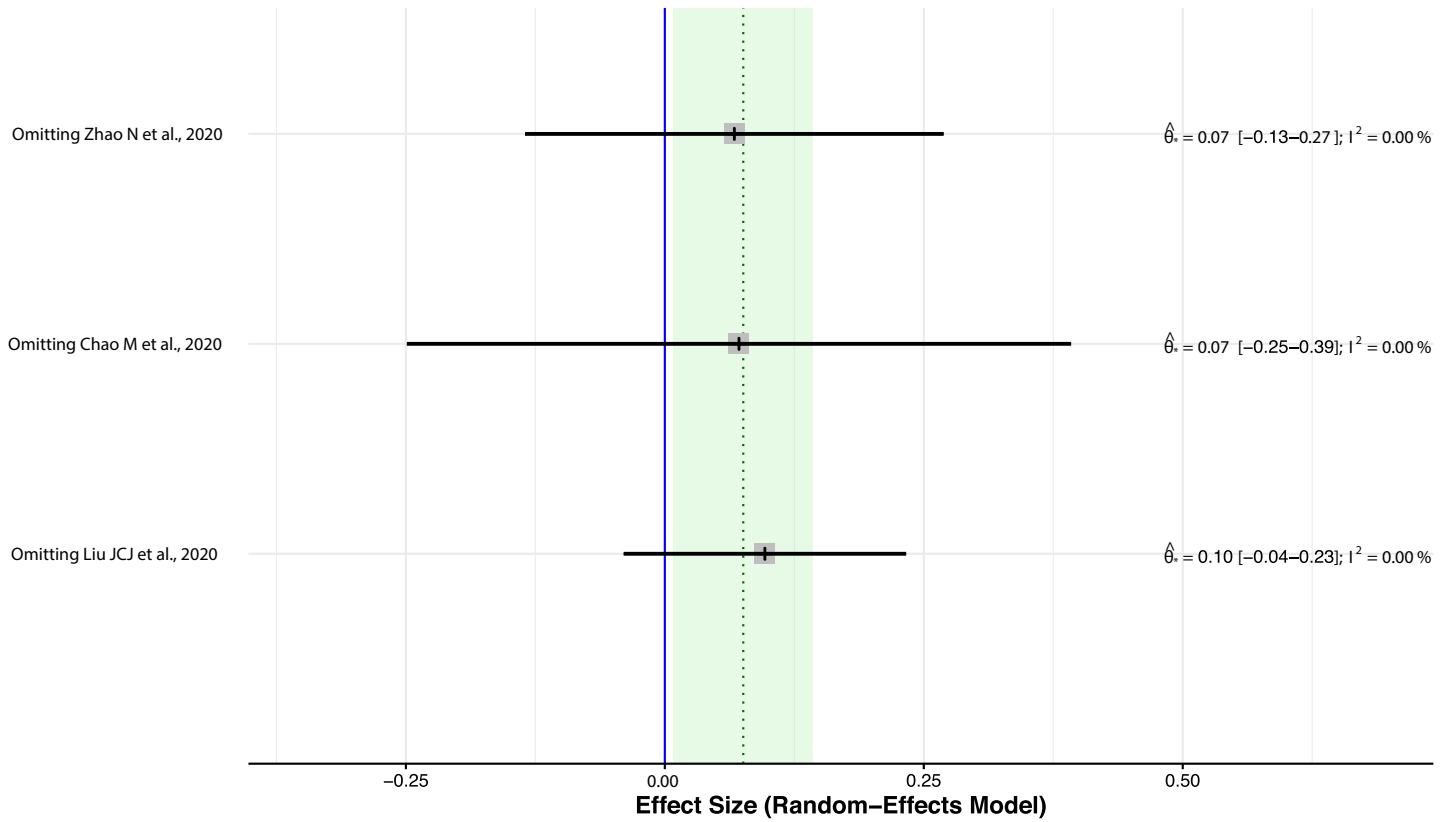

< Supplementary material 6-19: Influential analysis: sorted by effect size, Beta, Depression >

Sorted by  $I^2$

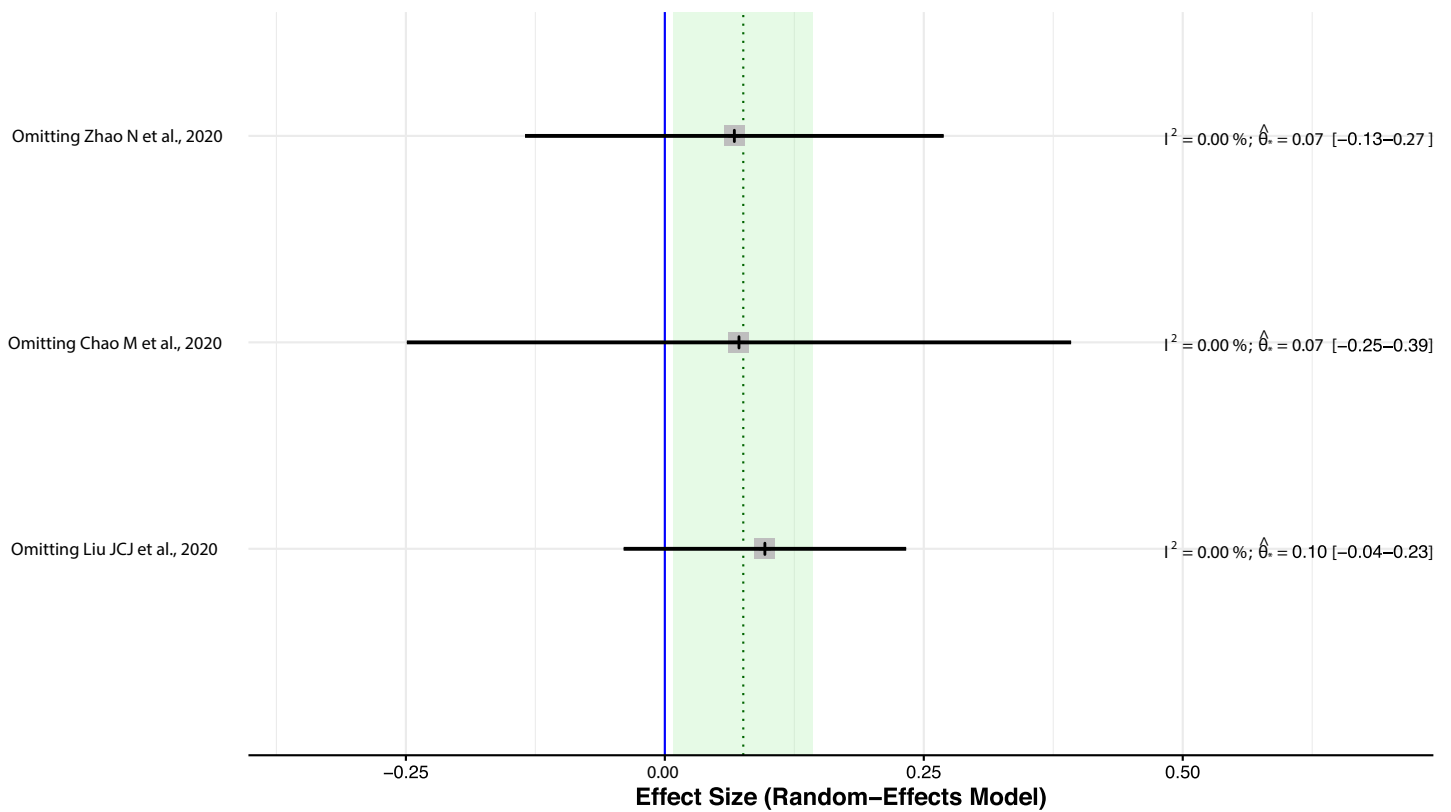

< Supplementary material 6-20: Influential analysis: sorted by  $I^2$ , Beta, Depression >

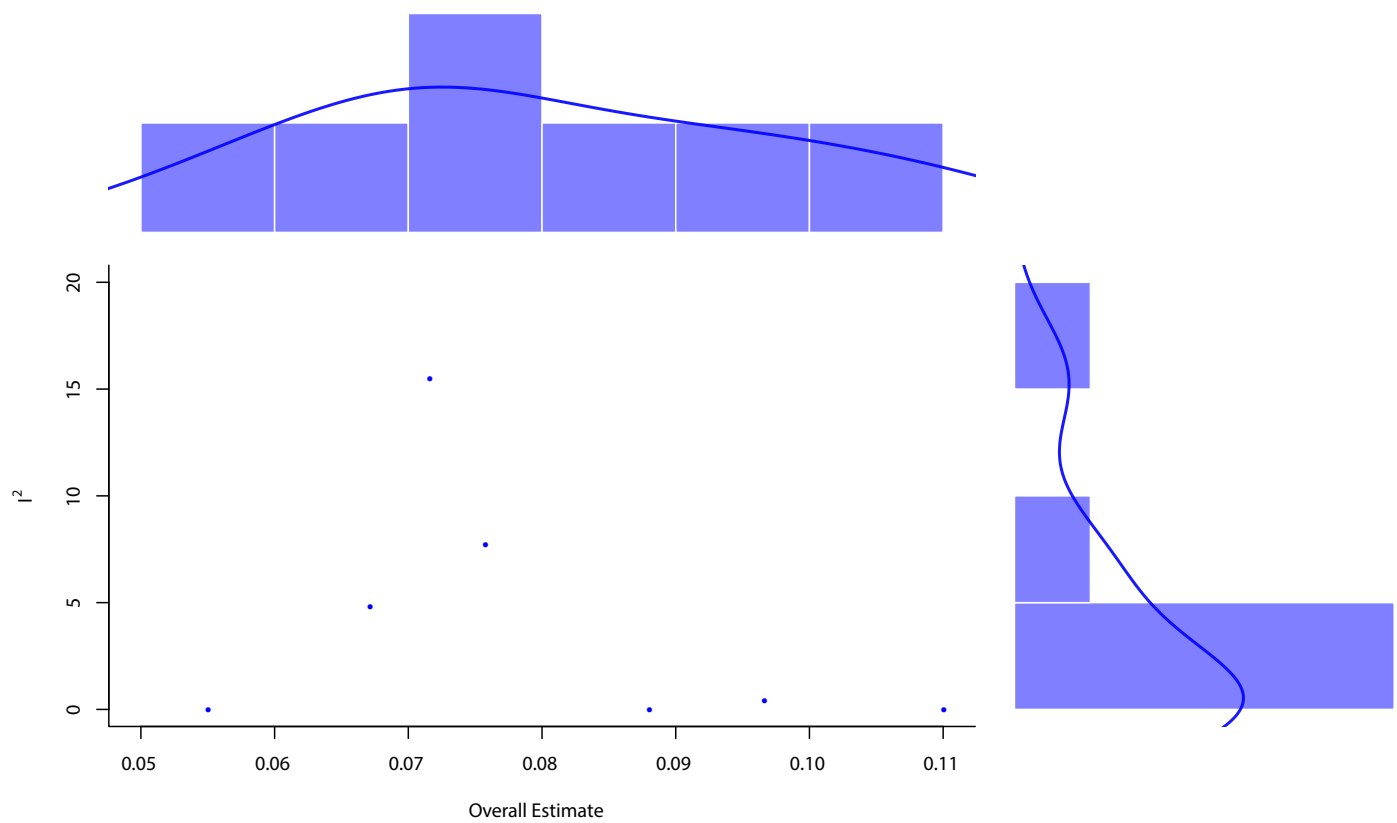

< Supplementary material 6-21: GOSH plot, Beta, Depression >

Supplementary material 7. Results for statistical inter- study heterogeneity assessment

| Outcome<br>Estimates | Overall effect size<br>ES (I <sup>2</sup> %) | Outlier detection<br>ES (I <sup>2</sup> %) | Influential<br>Analysis<br>ES (I <sup>2</sup> %) | GOSH analysis<br>ES (I <sup>2</sup> %) |
|----------------------|----------------------------------------------|--------------------------------------------|--------------------------------------------------|----------------------------------------|
| Anxiety symptoms     |                                              |                                            |                                                  |                                        |
| Odds ratio           | 1.55 (26.94%)                                | 1.55 (26.94%)                              | 1.45 (0.00%)                                     | 1.55 (26.94%)                          |
| Beta                 | 0.05 (76.07%)                                | 0.05 (76.07%)                              | 0.11 (73.50%)                                    | 0.05 (76.07%)                          |
| Pearson's r          | 0.18 (73.04%)                                | 0.18 (73.04%)                              | 0.22 (38.34%)                                    | 0.18 (73.04%)                          |
| Depressive symptoms  |                                              |                                            |                                                  |                                        |
| Odds ratio           | 1.43 (67.15%)                                | 1.43 (67.15%)                              | 1.30 (11.14%)                                    | 1.43 (67.15%)                          |
| Beta                 | 0.07 (0.00%)                                 | 0.07 (0.00%)                               | 0.10 (0.00%)                                     | 0.07 (0.00%)                           |

CI- Confidence Interval; ES- Effect size; GOSH– a Graphical Display of Study Heterogeneity.
